# Supplementary material for: Overview of retrospective data harmonisation in the MINDMAP project: process and results
Source: J Epidemiol Community Health. 2020 Nov 10;75(5):433–41. doi: 10.1136/jech-2020-214259 (PMC8053335; doi:10.1136/jech-2020-214259)
Supplement: Supplementary data [file jech-2020-214259supp003.pdf]

**Table S2.** DataSchema information for MINDMAP baseline and administrative variables (v2.0 - April 2020). The column # Events indicates the number of data collection events (baseline + follow-ups, up to 7) for which the equivalent variable was created. Equivalent variables in different follow-ups were distinguished by a numeric suffix (e.g., “sdc\_age\_1” for Age of participant in follow-up 1, “sdc\_age\_2” for Age of participant in follow-up 2, and so on.) Otherwise variable information was the same for equivalent variables.

| Variable name                                        | Format  | Label                                                       | Description                                                                                                                                     | Categories                                                                                                                                                                                                                         | # Events |
|------------------------------------------------------|---------|-------------------------------------------------------------|-------------------------------------------------------------------------------------------------------------------------------------------------|------------------------------------------------------------------------------------------------------------------------------------------------------------------------------------------------------------------------------------|----------|
| <b>Sociodemographic and economic characteristics</b> |         |                                                             |                                                                                                                                                 |                                                                                                                                                                                                                                    |          |
| sdc_age_0                                            | integer | Age of participant                                          | Age of the participant.                                                                                                                         | N/A                                                                                                                                                                                                                                | 7        |
| sdc_gender_0                                         | integer | Gender of participant                                       | Gender of the participant.                                                                                                                      | 0 = Male<br>1 = Female                                                                                                                                                                                                             | 7        |
| sdc_employ_0                                         | integer | Employment status                                           | Indicator of whether the participant is currently in paid employment or is self-employed.                                                       | 0 = Currently not in paid employment<br>1 = Currently in paid employment                                                                                                                                                           | 7        |
| sdc_retire_0                                         | integer | Retirement status                                           | Indicator of whether the participant is currently retired.                                                                                      | 0 = Currently not in retirement<br>1 = Currently in retirement                                                                                                                                                                     | 7        |
| sdc_retire_age_0                                     | integer | Retirement age                                              | Age of the participant at retirement.                                                                                                           | N/A                                                                                                                                                                                                                                | 3        |
| sdc_highest_edu_0                                    | integer | Highest level of education completed (ISCED 2011)           | Highest level of education completed by the participant in accordance with the International Standard Classification of Education (ISCED 2011). | 1 = Lower secondary or less (ISCED 0-2)<br>2 = Upper secondary (ISCED 3)<br>3 = Post-secondary non-tertiary education or short-cycle tertiary education (ISCED 4,5)<br>4 = Bachelor, master, doctoral, or equivalent (ISCED 6,7,8) | 5        |
| sdc_postsec_edu_0                                    | integer | Post-secondary education                                    | Indicator of whether the participant completed high school or post-secondary education.                                                         | 0 = Upper secondary or less (ISCED 0-3)<br>1 = Post-secondary non-tertiary education or more (ISCED 4-8)                                                                                                                           | 5        |
| sdc_income_0                                         | integer | Net annual household income                                 | Indicator of whether the net annual household income is above or below the country-specific net mean household income.                          | 0 = Less than or equal to country-specific net mean household income<br>1 = Greater than country-specific net mean household income                                                                                                | 7        |
| sdc_civstat_0                                        | integer | Civil status                                                | Indicator of the participant's current civil status.                                                                                            | 0 = Currently single or unmarried<br>1 = Currently married or living with partner<br>2 = Currently divorced or separated<br>3 = Currently widowed                                                                                  | 7        |
| sdc_livstat_0                                        | integer | Married or living with partner                              | Indicator of whether the participant is currently married or is currently living with a spouse or a partner in a common household.              | 0 = Currently not married or living with partner<br>1 = Currently married or living with partner                                                                                                                                   | 7        |
| sdc_num_pplhh_0                                      | integer | Number of people in household                               | Number of people currently living in the same household, including the participant.                                                             | N/A                                                                                                                                                                                                                                | 5        |
| sdc_num_childhh_0                                    | integer | Number of children in household                             | Number of children (biological or adopted) currently living in the same household as the participant.                                           | N/A                                                                                                                                                                                                                                | 5        |
| sdc_num_child_0                                      | integer | Number of children                                          | Number of children (biological or adopted) of the participant.                                                                                  | N/A                                                                                                                                                                                                                                | 5        |
| sdc_child_0                                          | integer | Children (biological or adopted)                            | Indicator of whether the participant has any children (biological or adopted) or not.                                                           | 0 = Does not have children<br>1 = Does have children                                                                                                                                                                               | 5        |
| soc_res_num_yrsnbh_0                                 | integer | Residential stability in neighbourhood (individual - level) | Number of years that the participant has lived in the neighbourhood.                                                                            | N/A                                                                                                                                                                                                                                | 7        |
| soc_res_num_yrshome_0                                | integer | Residential stability in home (individual - level)          | Number of years that participant has lived in current home/address.                                                                             | N/A                                                                                                                                                                                                                                | 7        |
| soc_res_move_0                                       | integer | Residential mobility (individual - level)                   | Indicator of whether the participant moved from their current neighbourhood since last interview.                                               | 0 = Has not moved since last interview<br>1 = Has moved since last interview                                                                                                                                                       | 7        |
| soc_res_indep_0                                      | integer | Residence independence                                      | Indicator of whether the participant lives independently or in a nursing/ retirement home.                                                      | 0 = Lives independently<br>1 = Lives in a nursing/ retirement home                                                                                                                                                                 | 7        |
| soc_res_home_own_dich_0                              | integer | Home ownership (2-level)                                    | Indicator of whether the participant owns home or not (i.e. pays rent or mortgage).                                                             | 0 = Does not own home<br>1 = Does own home                                                                                                                                                                                         | 7        |

| Variable name                  | Format  | Label                                                 | Description                                                                                                    | Categories                                                                                                                                                      | # Events |
|--------------------------------|---------|-------------------------------------------------------|----------------------------------------------------------------------------------------------------------------|-----------------------------------------------------------------------------------------------------------------------------------------------------------------|----------|
| soc_res_home_own_0             | integer | Home ownership (3-level)                              | Indicator of whether the participant owns home, pays mortgage or rents.                                        | 1 = Owns home<br>2 = Pays mortgage<br>3 = Rents home                                                                                                            | 3        |
| <b>Lifestyle and behaviors</b> |         |                                                       |                                                                                                                |                                                                                                                                                                 |          |
| lsb_alc_cur_0                  | integer | Current consumption of alcohol                        | Indicator of whether the participant currently consumes alcohol or has consumed alcohol in the past 12 months. | 0 = Does not currently consume alcohol<br>1 = Currently consumes alcohol                                                                                        | 7        |
| lsb_alc_ever_0                 | integer | Ever consumption of alcohol                           | Indicator of whether the participant has ever consumed alcohol.                                                | 0 = Never consumed alcohol<br>1 = Ever consumed alcohol                                                                                                         | 7        |
| lsb_alc_binge_0                | integer | Frequency of binge drinking                           | Frequency of drinking 4 or more drinks in one day.                                                             | 1 = 0 to 3 times a month<br>2 = 1 to 2 times a week<br>3 = 3 times a week or more                                                                               | 7        |
| lsb_alc_total_0                | decimal | Current quantity of alcohol consumed per week (total) | Current quantity of wine, beer and liquor consumed per week.                                                   | N/A                                                                                                                                                             | 4        |
| lsb_alc_wine_0                 | decimal | Current quantity of wine consumed per week            | Current quantity of wine consumed per week.                                                                    | N/A                                                                                                                                                             | 4        |
| lsb_alc_beer_0                 | decimal | Current quantity of beer consumed per week            | Current quantity of beer consumed per week.                                                                    | N/A                                                                                                                                                             | 4        |
| lsb_alc_liq_0                  | decimal | Current quantity of liquor consumed per week          | Current quantity of liquor consumed per week.                                                                  | N/A                                                                                                                                                             | 4        |
| lsb_smk_cur_0                  | integer | Current tobacco smoking                               | Indicator of whether the participant currently smokes any tobacco product.                                     | 0 = Currently does not smoke any tobacco product<br>1 = Currently smokes any tobacco product                                                                    | 7        |
| lsb_smk_status_0               | integer | Smoking status                                        | Smoking status of the participant.                                                                             | 0 = Never smoker<br>1 = Former smoker<br>2 = Current smoker                                                                                                     | 7        |
| lsb_smk_ever_0                 | integer | Ever tobacco smoking                                  | Indicator of whether the participant has ever smoked any tobacco product.                                      | 0 = Never smoked tobacco<br>1 = Ever smoked tobacco                                                                                                             | 7        |
| lsb_cig_qty_0                  | integer | Quantity cigarettes smoked                            | Current average number of cigarettes smoked per day.                                                           | N/A                                                                                                                                                             | 7        |
| lsb_smk_start_0                | integer | Smoking initiation age                                | Age at which the participant started smoking any tobacco product.                                              | N/A                                                                                                                                                             | 7        |
| lsb_smk_stop_0                 | integer | Smoking cessation age                                 | Age at which the participant last smoked any tobacco product.                                                  | N/A                                                                                                                                                             | 7        |
| lsb_smk_py_0                   | decimal | Pack years                                            | Number of estimated pack years of the participant.                                                             | N/A                                                                                                                                                             | 3        |
| lsb_pa_walk_freq_0             | integer | Frequency of walking                                  | Number of times the participant went for a walk in last week.                                                  | 0 = Never<br>1 = Seldom (1-2 days)<br>2 = Sometimes (3-4 days)<br>3 = Often (5-7 days)                                                                          | 7        |
| lsb_pa_walk_time_0             | integer | Average walking time                                  | Average time the participant spends walking per day.                                                           | 0 = Less than 30 minutes<br>1 = 30 minutes but less than 1 hour<br>2 = 1 hour but less than 2 hours<br>3 = 2 hours but less than 4 hours<br>4 = 4 hours or more | 7        |
| lsb_pa_walk_trans_0            | integer | Average walking time for transportation               | Minutes per week the participant spent on walking for transportation (utilitarian walking) in the last week.   | N/A                                                                                                                                                             | 5        |
| lsb_pa_walk_leis_0             | integer | Average walking time for leisure                      | Minutes per week the participant spent on walking for leisure in the last week.                                | N/A                                                                                                                                                             | 5        |
| lsb_pa_cycle_0                 | integer | Average cycling time                                  | Average minutes per week the participant spent on cycling in the last week.                                    | N/A                                                                                                                                                             | 7        |
| lsb_pa_garden_0                | integer | Gardening                                             | Indicator of whether the participant does any gardening activities.                                            | 0 = Does not do any gardening activities<br>1 = Does any gardening activities                                                                                   | 7        |
| lsb_pa_garden_time_0           | integer | Average gardening time                                | Average minutes per week the participant spent on gardening activities in the last week.                       | N/A                                                                                                                                                             | 7        |

| Variable name       | Format  | Label                             | Description                                                                                       | Categories                                                                                                   | # Events |
|---------------------|---------|-----------------------------------|---------------------------------------------------------------------------------------------------|--------------------------------------------------------------------------------------------------------------|----------|
| lsb_pa_house_0      | integer | Household activities              | Indicator of whether the participant does any household activities (light, moderate or vigorous). | 0 = Does not do any household activities<br>1 = Does any household activities                                | 7        |
| lsb_pa_house_time_0 | integer | Average household activities time | Average minutes per week the participant spent doing household activities in last week.           | N/A                                                                                                          | 7        |
| lsb_pa_sport_0      | integer | Sports or exercise                | Indicator of whether the participant does any sports or exercise.                                 | 0 = Does not do any sports or exercise<br>1 = Does any sports or exercise                                    | 7        |
| lsb_pa_sport_time_0 | integer | Average sports or exercise time   | Average time a week the participant spent on sports or exercise.                                  | 0 = never<br>1 = less than 1 hour a week<br>2 = between 1 and 2 hours a week<br>3 = more than 2 hours a week | 7        |
| lsb_veg_0           | integer | Daily vegetable consumption       | Indicator of whether the participant currently consumes vegetables on a daily basis.              | 0 = Does not consume vegetables on a daily basis<br>1 = Consumes vegetables on a daily basis                 | 3        |
| lsb_fruit_0         | integer | Daily fruit consumption           | Indicator of whether the participant currently consumes fruit on a daily basis.                   | 0 = Does not consume fruit on a daily basis<br>1 = Consumes fruit on a daily basis                           | 3        |
| lsb_water_0         | integer | Daily water consumption           | Indicator of whether the participant drinks water on a daily basis.                               | 0 = Does not drink water on a daily basis<br>1 = Drinks water on a daily basis                               | 5        |
| lsb_coffee_qty_0    | integer | Quantity daily coffee             | Current quantity of coffee the participant consumes per day.                                      | N/A                                                                                                          | 5        |
| lsb_sleep_hours_0   | integer | Average sleep hours               | Average number of hours the participant sleeps per night.                                         | N/A                                                                                                          | 6        |
| lsb_sleep_diff_0    | integer | Difficulty falling asleep         | Indicator of whether the participant ever has any difficulty falling asleep.                      | 0 = Never has difficulty falling asleep<br>1 = Sometimes has difficulty falling asleep                       | 6        |
| soc_sp_hobby_0      | integer | Hobby                             | Indicator of whether the participant has a hobby.                                                 | 0 = Does not have a hobby<br>1 = Does have a hobby                                                           | 7        |

**Perception of health, quality of life, development, and functional limitations**

|                        |         |                                           |                                                                                                                                                                        |                                                                                                                       |   |
|------------------------|---------|-------------------------------------------|------------------------------------------------------------------------------------------------------------------------------------------------------------------------|-----------------------------------------------------------------------------------------------------------------------|---|
| poh_sah_0              | integer | Self-assessed health                      | Self-assessed health of the participant, in three main categories.                                                                                                     | 0 = Good health<br>1 = Fair health<br>2 = Poor health                                                                 | 7 |
| poh_sah_poor_0         | integer | Poor self-assessed health                 | Dichotomous indicator of self-assessed health of the participant, indicating poor vs non-poor health.                                                                  | 0 = Poor health<br>1 = Non-poor health                                                                                | 7 |
| poh_sah_good_0         | integer | Less than good self-assessed health       | Dichotomous indicator of self-assessed health of the participant, indicating good vs less than good health.                                                            | 0 = Less than good health<br>1 = Good health                                                                          | 7 |
| fct_stairs_diff_0      | integer | Difficulty walking up and down the stairs | Indicator of whether the participant has difficulty walking up and down the stairs.                                                                                    | 0 = Has no difficulty walking up and down the stairs<br>1 = Has difficulty walking up and down the stairs             | 3 |
| fct_walk_diff_0        | integer | Difficulty walking                        | Indicator of whether the participant has difficulty walking 2 to 3 blocks, or for about 400 to 500 meters, or for 5 minutes.                                           | 0 = Not able to walk without difficulty<br>1 = Able to walk without difficulty                                        | 7 |
| psy_life_sat_tertile_0 | integer | Life satisfaction tertiles                | Indicator of whether the participant has high, medium or low levels of life satisfaction measured by tertiles of the scale- or item- specific life satisfaction score. | 0 = High levels of life satisfaction<br>1 = Medium levels of life satisfaction<br>2 = Low levels of life satisfaction | 7 |
| psy_life_sat_low_0     | integer | Lowest level of life satisfaction         | Indicator of whether the participant is in the lowest quartile of life satisfaction measured by the scale- or item-specific life satisfaction score.                   | 0 = Second to highest quartile of life satisfaction score<br>1 = Lowest quartile of life satisfaction score           | 7 |
| psy_qol_tertile_0      | integer | Quality of life tertiles                  | Indicator of whether the participant has high, medium or low levels of quality of life measured by tertiles of the scale-specific quality of life score.               | 0 = High levels of quality of life<br>1 = Medium levels of quality of life<br>2 = Low levels of quality of life       | 5 |
| psy_qol_low_0          | integer | Lowest level of quality of life           | Indicator of whether the participant is in the lowest quintile of quality of life measured by the scale-specific quality of life score.                                | 0 = Second to highest quintile of quality of life score<br>1 = Lowest quintile of quality of life score               | 5 |

| Variable name                            | Format  | Label                                                                     | Description                                                                                                                                         | Categories                                                                                                                              | # Events |
|------------------------------------------|---------|---------------------------------------------------------------------------|-----------------------------------------------------------------------------------------------------------------------------------------------------|-----------------------------------------------------------------------------------------------------------------------------------------|----------|
| <b>Diseases (ICD-10)</b>                 |         |                                                                           |                                                                                                                                                     |                                                                                                                                         |          |
| dis_hbp_ever_0                           | integer | Lifetime occurrence of high blood pressure or hypertension                | Occurrence of high blood pressure or hypertension at any point during the life of the participant.                                                  | 0 = Never had high blood pressure or hypertension<br>1 = Ever had high blood pressure or hypertension                                   | 2        |
| dis_angina_ever_0                        | integer | Lifetime occurrence of angina                                             | Occurrence of angina (pain or discomfort in chest) at any point during the life of the participant.                                                 | 0 = Never had angina<br>1 = Ever had angina                                                                                             | 5        |
| dis_mi_ever_0                            | integer | Lifetime occurrence of myocardial infarction                              | Occurrence of myocardial infarction (heart attack) at any point during the life of the participant.                                                 | 0 = Never had myocardial infarction<br>1 = Ever had myocardial infarction                                                               | 3        |
| dis_mi_age_0                             | integer | Age at first Myocardial infarction                                        | Age of the participant at time of first myocardial infarction.                                                                                      | N/A                                                                                                                                     | 3        |
| dis_stroke_ever_0                        | integer | Lifetime occurrence of stroke or CVA                                      | Occurrence of stroke or cerebrovascular accident (CVA) at any point during the life of the participant.                                             | 0 = Never had stroke or CVA<br>1 = Ever had stroke or CVA                                                                               | 3        |
| dis_stroke_age_0                         | integer | Age at first stroke or CVA                                                | Age of the participant at time of first stroke or cerebrovascular accident (CVA).                                                                   | N/A                                                                                                                                     | 3        |
| dis_diab_ever_0                          | integer | Lifetime occurrence of diabetes, borderline diabetes, or high blood sugar | Occurrence of diabetes, borderline diabetes, or high blood sugar, at any point during the life of the participant.                                  | 0 = Never had diabetes<br>1 = Ever had diabetes                                                                                         | 6        |
| dis_diab_age_0                           | integer | Age at diagnosis of diabetes, borderline diabetes, or high blood sugar    | Age of the participant at first diagnosis of diabetes, borderline diabetes, or high blood sugar.                                                    | N/A                                                                                                                                     | 6        |
| <b>Medication and supplements</b>        |         |                                                                           |                                                                                                                                                     |                                                                                                                                         |          |
| dis_hbp_med_0                            | integer | Medication for high blood pressure or hypertension                        | Indicator of whether the participant has ever taken medication for high blood pressure or hypertension.                                             | 0 = Never taken medication for high blood pressure or hypertension<br>1 = Ever taken medication for high blood pressure or hypertension | 6        |
| dis_diab_tx_0                            | integer | Currently under treatment for diabetes                                    | Indicator of whether the participant is currently under treatment for diabetes.                                                                     | 0 = Not currently under treatment for diabetes<br>1 = Currently under treatment for diabetes                                            | 6        |
| dis_diab_ins_0                           | integer | Currently use insulin for diabetes                                        | Indicator of whether the participant uses insulin for diabetes treatment.                                                                           | 0 = Currently does not use insulin for diabetes treatment<br>1 = Currently does use insulin for diabetes treatment                      | 3        |
| <b>Physical measures and assessments</b> |         |                                                                           |                                                                                                                                                     |                                                                                                                                         |          |
| phy_weight_ms_0                          | decimal | Weight in kg - measured                                                   | Weight of the participant in kilograms - measured.                                                                                                  | N/A                                                                                                                                     | 7        |
| phy_weight_sr_0                          | decimal | Weight in kg - self-reported                                              | Weight of the participant in kilograms - self-reported.                                                                                             | N/A                                                                                                                                     | 7        |
| phy_weight_all_0                         | decimal | Weight in kg - measured and self-reported combined                        | Weight of the participant in kilograms - measured and self-reported combined.                                                                       | N/A                                                                                                                                     | 7        |
| phy_height_ms_0                          | decimal | Height in cm - measured                                                   | Height of the participant in centimeters - measured.                                                                                                | N/A                                                                                                                                     | 7        |
| phy_height_sr_0                          | decimal | Height in cm - self-reported                                              | Height of the participant in centimeters - self-reported.                                                                                           | N/A                                                                                                                                     | 7        |
| phy_height_all_0                         | decimal | Height in cm - measured and self-reported combined                        | Height of the participant in centimeters - self-reported and measured combined.                                                                     | N/A                                                                                                                                     | 7        |
| phy_bmi_ms_0                             | decimal | Body mass index (BMI) - measured                                          | Weight (in kg) divided by height (in m) squared - measured.                                                                                         | N/A                                                                                                                                     | 7        |
| phy_bmi_sr_0                             | decimal | Body mass index (BMI) - self-reported                                     | Weight (in kg) divided by height (in m) squared - self-reported.                                                                                    | N/A                                                                                                                                     | 7        |
| phy_bmi_all_0                            | decimal | Body mass index (BMI) - measured and self-reported combined               | Weight (in kg) divided by height (in m) squared - measured and self-reported combined.                                                              | N/A                                                                                                                                     | 7        |
| phy_bmi_cat_ms_0                         | integer | Body mass index (BMI) - categories - measured                             | Body mass index in categories - underweight (<18.5 kg/m2), normal (18.5-24.99 kg/m2), overweight (25 to 29.99 kg/m2), obese (≥30 kg/m2) - measured. | 0 = Underweight - BMI <18.5<br>1 = Normal weight - BMI 18.5-24.99<br>2 = Overweight - BMI 25-29.99<br>3 = Obese - BMI ≥30               | 7        |

| Variable name                                                             | Format  | Label                                                                                                        | Description                                                                                                                                                                                                                                  | Categories                                                                                                                | # Events |
|---------------------------------------------------------------------------|---------|--------------------------------------------------------------------------------------------------------------|----------------------------------------------------------------------------------------------------------------------------------------------------------------------------------------------------------------------------------------------|---------------------------------------------------------------------------------------------------------------------------|----------|
| phy_bmi_cat_sr_0                                                          | integer | Body mass index (BMI) - categories - self-reported                                                           | Body mass index in categories - underweight (<18.5 kg/m <sup>2</sup> ), normal (18.5-24.99 kg/m <sup>2</sup> ), overweight (25 to 29.99 kg/m <sup>2</sup> ), obese (≥30 kg/m <sup>2</sup> ) - self-reported.                                 | 0 = Underweight - BMI <18.5<br>1 = Normal weight - BMI 18.5-24.99<br>2 = Overweight - BMI 25-29.99<br>3 = Obese - BMI ≥30 | 7        |
| phy_bmi_cat_all_0                                                         | integer | Body mass index (BMI) - categories - measured and self-reported combined                                     | Body mass index in categories - underweight (<18.5 kg/m <sup>2</sup> ), normal (18.5-24.99 kg/m <sup>2</sup> ), overweight (25 to 29.99 kg/m <sup>2</sup> ), obese (≥30 kg/m <sup>2</sup> ) - measured and self-reported combined.           | 0 = Underweight - BMI <18.5<br>1 = Normal weight - BMI 18.5-24.99<br>2 = Overweight - BMI 25-29.99<br>3 = Obese - BMI ≥30 | 7        |
| phy_waist_all_0                                                           | decimal | Waist circumference in cm - measured and self-reported combined                                              | Waist circumference of the participant in centimeters - measured and self-reported combined.                                                                                                                                                 | N/A                                                                                                                       | 7        |
| <b>Cognition, personality, and psychological measures and assessments</b> |         |                                                                                                              |                                                                                                                                                                                                                                              |                                                                                                                           |          |
| psy_anxiety_score_0                                                       | integer | Anxiety symptom score measured by the Hospital Anxiety & Depression Scale - Anxiety subscale (HADS-A)        | Anxiety symptom score ranging from 0 to 21.                                                                                                                                                                                                  | N/A                                                                                                                       | 7        |
| psy_anxiety_case_0                                                        | integer | Probable caseness of anxiety measured by the Hospital Anxiety & Depression Scale - Anxiety subscale (HADS-A) | Indicator of whether the participant has elevated anxiety symptoms in accordance with the HADS-A threshold from Zigmond & Snaith (1983) and Snaith (2003).                                                                                   | 0 = Non-case (0-10 anxiety symptom score)<br>1 = Case (11-21 anxiety symptom score)                                       | 7        |
| psy_anxious_yn_0                                                          | integer | Feels anxious or nervous                                                                                     | Single item question on whether the participant feels anxious or nervous.                                                                                                                                                                    | 0 = Does not feel anxious or nervous<br>1 = Feels anxious or nervous                                                      | 7        |
| cog_imm_rscale_0                                                          | integer | Immediate word recall                                                                                        | Rescaled value (ranging from 0 to 10) of the total number of words immediately recalled during a test of verbal memory. If the test is performed more than once, data are based on the first trial.                                          | N/A                                                                                                                       | 7        |
| cog_imm_low_0                                                             | integer | Low immediate word recall                                                                                    | Indicator of whether the participant has low immediate word recall using a median split on the total (rescaled) number of words immediately recalled. If the test is performed more than once, data are based on the first trial.            | 0 = High immediate word recall<br>1 = Low immediate word recall                                                           | 7        |
| cog_del_rscale_0                                                          | integer | Delayed word recall                                                                                          | Rescaled value (ranging from 0 to 10) of the total number of words recalled following an interval. If the test is performed more than once, data are based on the first trial.                                                               | N/A                                                                                                                       | 7        |
| cog_del_low_0                                                             | integer | Low delayed word recall                                                                                      | Indicator of whether the participant has low delayed word recall using a median split on the total (rescaled) number of words recalled following an interval. If the test is performed more than once, data are based on the first trial.    | 0 = High delayed word recall<br>1 = Low delayed word recall                                                               | 7        |
| cog_verb_std_0                                                            | decimal | Verbal fluency                                                                                               | Standardised value (z-score) of the total number of correctly named words from the given category (animals). If the test is performed more than once, data are based on the first trial.                                                     | N/A                                                                                                                       | 7        |
| cog_verb_low_0                                                            | integer | Low verbal fluency                                                                                           | Indicator of whether the participant has low verbal fluency using a median split on the total number of correctly named words from the given category (animals). If the test is performed more than once, data are based on the first trial. | 0 = High verbal fluency<br>1 = Low verbal fluency                                                                         | 7        |
| cog_proc_std_0                                                            | decimal | Processing speed                                                                                             | Standardised value (z-score) of the total number of items recalled correctly in a processing speed task. If the test is performed more than once, data are based on the first trial.                                                         | N/A                                                                                                                       | 7        |

| Variable name            | Format  | Label                                                          | Description                                                                                                                                                                                                                                                                                             | Categories                                                                                                                                                                                    | # Events |
|--------------------------|---------|----------------------------------------------------------------|---------------------------------------------------------------------------------------------------------------------------------------------------------------------------------------------------------------------------------------------------------------------------------------------------------|-----------------------------------------------------------------------------------------------------------------------------------------------------------------------------------------------|----------|
| cog_proc_slow_0          | integer | Slow processing speed                                          | Indicator of whether the participant has slow processing speed using a median split on the total number of items recalled correctly. If the test is performed more than once, data are based on the first trial.                                                                                        | 0 = Fast processing speed<br>1 = Slow processing speed                                                                                                                                        | 7        |
| cog_comp_std_0           | decimal | Composite cognition score from individual cognitive tests      | Composite cognition standardized value (z-score) obtained by averaging the four individual cognitive test scores (cog_imm_rscale_0, cog_del_rscale_0, cog_verb_std_0 and cog_proc_std_0). Immediate and delayed word recall scores were first standardized to z-scores for comparability across scores. | N/A                                                                                                                                                                                           | 7        |
| cog_comp_case_0          | integer | Composite cognitive impairment from individual cognitive tests | Indicator of whether the participant has cognitive impairment using a median split on the composite cognition score from individual test scores.                                                                                                                                                        | 0 = No cognitive impairment<br>1 = Cognitive impairment                                                                                                                                       | 7        |
| cog_mmse_score_0         | integer | Current cognition score measured by the MMSE                   | Current cognition score ranging from 0 to 30 measured by the Mini Mental State Examination (MMSE).                                                                                                                                                                                                      | N/A                                                                                                                                                                                           | 7        |
| cog_mmse_case_0          | integer | Current cognitive impairment measured by the MMSE              | Indicator of whether the participant has cognitive impairment in accordance with the Mini Mental State Examination (MMSE) threshold from Lezak, Howieson and Loring (2004).                                                                                                                             | 0 = No cognitive impairment (24-30 MMSE score)<br>1 = Cognitive impairment (0-23 MMSE score)                                                                                                  | 7        |
| psy_dep_tertile_0        | integer | Depressive symptom severity tertiles                           | Indicator of whether the participant has low, medium or high severity of depressive symptoms measured by tertiles of the scale-specific depressive symptom score.                                                                                                                                       | 0 = Low severity tertile of depressive symptoms<br>1 = Medium severity tertile of depressive symptoms<br>2 = High severity tertile of depressive symptoms                                     | 7        |
| psy_dep_case_0           | integer | Probable caseness of depression                                | Indicator of whether the participant has elevated depressive symptoms in accordance with the scale-specific threshold of depressive symptom score.                                                                                                                                                      | 0 = Non-case (no elevated depressive symptoms)<br>1 = Case (elevated depressive symptoms)                                                                                                     | 7        |
| psy_dep_yn_0             | integer | Feels sad, downhearted or blue                                 | Indicator of whether the participant feels sad, downhearted or blue (single item question).                                                                                                                                                                                                             | 0 = Does not feel sad, downhearted or blue<br>1 = Feels sad, downhearted or blue                                                                                                              | 7        |
| psy_loneliness_tertile_0 | integer | Loneliness tertiles                                            | Indicator of whether the participant has low, medium, or high levels of loneliness measured by tertiles of the scale-specific loneliness score.                                                                                                                                                         | 0 = Low levels of loneliness<br>1 = Medium levels of loneliness<br>2 = High levels of loneliness                                                                                              | 7        |
| psy_loneliness_high_0    | integer | Highest level of loneliness                                    | Indicator of whether the participant is in the top quintile of loneliness measured by the scale-specific loneliness score.                                                                                                                                                                              | 0 = Second to lowest quintile of loneliness score<br>1 = Top quintile of loneliness score                                                                                                     | 7        |
| psy_lonely_yn_0          | integer | Feels lonely                                                   | Indicator of whether the participant feels lonely (single item question).                                                                                                                                                                                                                               | 0 = Does not feel lonely<br>1 = Feels lonely                                                                                                                                                  | 7        |
| psy_ptsd_case_0          | integer | Probable caseness of post-traumatic stress disorder            | Indicator of whether the participant has elevated post-traumatic stress disorder (PTSD) symptoms in accordance with the scale-specific threshold of PTSD score.                                                                                                                                         | 0 = Non-case (no elevated PTSD symptoms)<br>1 = Case (elevated PTSD symptoms)                                                                                                                 | 4        |
| psy_distress_tertile_0   | integer | Psychological distress severity tertiles                       | Indicator of whether the participant has low, medium or high severity of psychological distress symptoms measured by tertiles of the scale-specific psychological distress score.                                                                                                                       | 0 = Low severity tertile of psychological distress symptoms<br>1 = Medium severity tertile of psychological distress symptoms<br>2 = High severity tertile of psychological distress symptoms | 7        |
| psy_distress_case_0      | integer | Probable caseness of psychological distress                    | Indicator of whether the participant has elevated psychological distress symptoms in accordance with the scale-specific threshold of psychological distress score.                                                                                                                                      | 0 = Non-case (no elevated psychological distress symptoms)<br>1 = Case (elevated psychological distress symptoms)                                                                             | 7        |
| soc_res_satis_0          | integer | Neighbourhood satisfaction                                     | Indicator of whether the participant desires to move away from their current neighbourhood.                                                                                                                                                                                                             | 0 = Does not want to move out of neighbourhood<br>1 = Does want to move out of neighbourhood                                                                                                  | 6        |

| Variable name                                       | Format  | Label                                        | Description                                                                                                                                                                                                                                                                                                                                                                                                                                                                                             | Categories                                                                                                                                                                                                               | # Events |
|-----------------------------------------------------|---------|----------------------------------------------|---------------------------------------------------------------------------------------------------------------------------------------------------------------------------------------------------------------------------------------------------------------------------------------------------------------------------------------------------------------------------------------------------------------------------------------------------------------------------------------------------------|--------------------------------------------------------------------------------------------------------------------------------------------------------------------------------------------------------------------------|----------|
| <b>Life events, life plans, beliefs, and values</b> |         |                                              |                                                                                                                                                                                                                                                                                                                                                                                                                                                                                                         |                                                                                                                                                                                                                          |          |
| soc_le_vic_0                                        | integer | Life event: victim                           | Indicator of whether the participant experienced being the victim of a crime (i.e. theft, assault) in the past few years.                                                                                                                                                                                                                                                                                                                                                                               | 0 = Did not experience being the victim of a crime<br>1 = Did experience being the victim of a crime                                                                                                                     | 7        |
| soc_le_fprob_0                                      | integer | Life event: financial problems               | Indicator of whether the participant experienced financial problems in the past few years.                                                                                                                                                                                                                                                                                                                                                                                                              | 0 = Did not experience financial problems<br>1 = Did experience financial problems                                                                                                                                       | 7        |
| soc_le_rprob_0                                      | integer | Life event: relationship problems            | Indicator of whether the participant experienced relationship problems in the past few years.                                                                                                                                                                                                                                                                                                                                                                                                           | 0 = Did not experience relationship problems<br>1 = Did experience relationship problems                                                                                                                                 | 3        |
| soc_le_divorce_0                                    | integer | Life event: divorce/relationship breakup     | Indicator of the occurrence of divorce/relationship breakup in the past few years.                                                                                                                                                                                                                                                                                                                                                                                                                      | 0 = Did not divorce/ have relationship breakup<br>1 = Did divorce/ had relationship breakup                                                                                                                              | 3        |
| soc_le_illfam_0                                     | integer | Life event: illness of family member         | Indicator of whether the participant experienced the illness of family member (including partner) in the past few years.                                                                                                                                                                                                                                                                                                                                                                                | 0 = Did not experience illness of family member<br>1 = Did experience illness of family member                                                                                                                           | 7        |
| soc_le_dpart_0                                      | integer | Life event: death of partner                 | Indicator of whether the participant experienced the death of partner/spouse in the past few years.                                                                                                                                                                                                                                                                                                                                                                                                     | 0 = Did not experience death of partner/spouse<br>1 = Did experience death of partner/spouse                                                                                                                             | 3        |
| soc_le_dfam_0                                       | integer | Life event: death of family member or friend | Indicator of whether the participant experienced the death of a child/family member/friend in the past few years.                                                                                                                                                                                                                                                                                                                                                                                       | 0 = Did not experience death of child/family member/friend<br>1 = Did experience death of child/family member/friend                                                                                                     | 3        |
| <b>Social environment and relationships</b>         |         |                                              |                                                                                                                                                                                                                                                                                                                                                                                                                                                                                                         |                                                                                                                                                                                                                          |          |
| soc_sn_num_children_0                               | integer | Network size of children                     | Number of living biological, adopted or step children.                                                                                                                                                                                                                                                                                                                                                                                                                                                  | N/A                                                                                                                                                                                                                      | 7        |
| soc_sn_children_rank_0                              | integer | Ranked network size of children              | Indicator of whether the participant has a low, medium or high network size comprised of children. It is measured by ranking the size of the network which is comprised of any type of child (biological, step, adoptive, foster, in-law son/daughter). Low rank indicates no children. Note: cohorts inquire about different types of children due to the particular questionnaire used, therefore a childless respondent in one study would not necessarily be considered childless in another study. | 0 = Low rank of network size comprised of children (childless)<br>1 = Medium rank of network size comprised of children (1 or 2 children)<br>2 = Large rank of network size comprised of children (more than 2 children) | 7        |
| soc_sn_num_friends_0                                | integer | Network size of friends                      | Number of close friends. These are friends which the participant feels they can talk to/reach out to.                                                                                                                                                                                                                                                                                                                                                                                                   | N/A                                                                                                                                                                                                                      | 7        |
| soc_sn_freq_friends_inperson_0                      | integer | In-person contact frequency with friends     | Indicator of the frequency at which the participant has in-person contact with close friends.                                                                                                                                                                                                                                                                                                                                                                                                           | 1 = Daily to several times per month in-person contact with friends<br>2 = Once per month in-person contact with friends<br>3 = A few times per year, once per year or never in-person contact with friends              | 5        |
| soc_sn_freq_friends_0                               | integer | Contact frequency with friends               | Indicator of the frequency at which the participant has contact with close friends.                                                                                                                                                                                                                                                                                                                                                                                                                     | 1 = Daily to several times per month contact with friends<br>2 = Once per month contact with friends<br>3 = A few times per year, once per year or never contact with friends                                            | 7        |
| soc_sn_num_nbhs_0                                   | integer | Network size of neighbours                   | Indicator of the number of neighbours that the participant knows well enough to be in touch with or visit.                                                                                                                                                                                                                                                                                                                                                                                              | 1 = No neighbours<br>2 = 1 or 2 neighbours<br>3 = 3 to 5 neighbours<br>4 = 6 to 10 neighbours<br>5 = 11 to 20 neighbours<br>6 = More than 20 neighbours                                                                  | 7        |

| Variable name                 | Format  | Label                               | Description                                                                                                                                                                                                                                   | Categories                                                                                                                                                                                                       | # Events |
|-------------------------------|---------|-------------------------------------|-----------------------------------------------------------------------------------------------------------------------------------------------------------------------------------------------------------------------------------------------|------------------------------------------------------------------------------------------------------------------------------------------------------------------------------------------------------------------|----------|
| soc_sn_freq_nbhs_0            | integer | Contact frequency with neighbours   | Indicator of the contact frequency with neighbours that the participant knows well enough to be in touch with or visit.                                                                                                                       | 1 = Daily to several times per month contact with neighbours<br>2 = Once per month contact with neighbours<br>3 = A few times per year, once per year or never contact with neighbours                           | 7        |
| soc_sn_num_relatives_0        | integer | Network size of relatives           | Number of relatives, including siblings and excluding partner/children living at home, which the participant is close to, i.e. is in touch with regularly.                                                                                    | 1 = None<br>2 = 1 or 2<br>3 = 3 to 5<br>4 = 6 to 10<br>5 = 11 to 20<br>6 = More than 20                                                                                                                          | 7        |
| soc_sn_freq_close_relatives_0 | integer | Contact frequency with family       | Indicator of the contact frequency with relatives including siblings and children, which participant is close to.                                                                                                                             | 1 = Daily to less than monthly (once per month) contact with family<br>2 = Once per month contact with family<br>3 = A few times per year, once per year or never contact with family                            | 7        |
| soc_sn_freq_relatives_0       | integer | Contact frequency with relatives    | Indicator of the contact frequency with relatives, including siblings and children regardless of how close the participant feels to them.                                                                                                     | 1 = Daily to less than monthly (once per month) contact with relatives<br>2 = Once per month contact with relatives<br>3 = A few times per year, once per year or never contact with relatives                   | 7        |
| soc_sn_num_nonkin_0           | integer | Network size of non-kin             | Number of non-kin members of the participant's social network consisting of neighbours, colleagues (from work or school), members of associations (that participant is a part of, such as community activities and organization) and friends. | N/A                                                                                                                                                                                                              | 7        |
| soc_sn_freq_nonkin_0          | integer | Contact frequency with non-kin      | Indicator of the contact frequency with non-kin members of social network, consisting of neighbours, relatives and friends.                                                                                                                   | 1 = Daily to less than monthly (once per month) contact with non-kin members<br>2 = Once per month contact with non-kin members<br>3 = A few times per year, once per year or never contact with non-kin members | 7        |
| soc_ss_received_emo_0         | integer | Received emotional support          | Indicator of the frequency of received emotional support i.e. receiving affection from or sharing personal experiences/feelings with, from the participant's three social network members that they indicated they are closest to.            | 0 = Never received emotional support<br>1 = Sometimes received emotional support<br>2 = Often received emotional support                                                                                         | 7        |
| soc_ss_received_instru_0      | integer | Received instrumental support       | Indicator of the frequency of received instrumental support, i.e. tangible help, from the participant's three social network members that they indicated they are closest to.                                                                 | 0 = Never received instrumental support<br>1 = Sometimes received instrumental support<br>2 = Often received instrumental support                                                                                | 7        |
| soc_ss_Zscore_perceived_emo_0 | decimal | Perceived emotional support Z-score | Z-score of perceived emotional support.                                                                                                                                                                                                       | N/A                                                                                                                                                                                                              | 7        |
| soc_ss_perceived_instru_0     | integer | Perceived instrumental support      | Indicator of perceived instrumental support, i.e. participant feels like there is someone to help with daily chores in case of need.                                                                                                          | 0 = Feels tangible help is available<br>1 = Does not feel tangible help is available                                                                                                                             | 7        |
| soc_sp_religious_0            | integer | Religious participation             | Indicator of participation in a religious organization.                                                                                                                                                                                       | 0 = Does not participate in a religious organization<br>1 = Does participate in a religious organization                                                                                                         | 7        |

| Variable name           | Format  | Label                                           | Description                                                                                                                                                                                 | Categories                                                                                                                                                                                                                                                                                                   | # Events |
|-------------------------|---------|-------------------------------------------------|---------------------------------------------------------------------------------------------------------------------------------------------------------------------------------------------|--------------------------------------------------------------------------------------------------------------------------------------------------------------------------------------------------------------------------------------------------------------------------------------------------------------|----------|
| soc_sp_freq_religious_0 | integer | Frequency of religious participation            | Indicator of the frequency of participation in a religious organization.                                                                                                                    | 1 = Weekly participation in religious organization<br>2 = Less than monthly participation in religious organization<br>3 = Monthly participation in religious organization<br>4 = Never participates in religious organization<br>5 = No answer/don't know regarding participation in religious organization | 7        |
| soc_sp_cultural_edu_0   | integer | Cultural and educational participation          | Indicator of whether the participant is a member of/participates in a group, club or activity related to education or culture.                                                              | 0 = Does not participate in a cultural or educational organization<br>1 = Does participate in a cultural or educational organization                                                                                                                                                                         | 7        |
| soc_sp_cul_edu_soc_0    | integer | Cultural, educational and social participation  | Indicator of whether the participant is a member of/participates in a group, club or activity related to culture, educational or social activities.                                         | 0 = Does not participate in a cultural, educational or social organization<br>1 = Does participate in a cultural, educational or social organization                                                                                                                                                         | 7        |
| soc_sp_volunteer_0      | integer | Volunteering                                    | Indicator of whether the participant takes part in volunteer activities including charity work or volunteer work in an association with a social aim.                                       | 0 = Does not take part in volunteer activities<br>1 = Does take part in volunteer activities                                                                                                                                                                                                                 | 7        |
| soc_sp_pol_0            | integer | Political / union participation                 | Indicator of participation in a union or political party.                                                                                                                                   | 0 = Does not participate in a civic organization<br>1 = Does participate in a civic organization                                                                                                                                                                                                             | 7        |
| soc_sp_prof_0           | integer | Professional participation                      | Indicator of participation in a professional association, including a union or neighbourhood association.                                                                                   | 0 = Does not participate in an union, professional or neighbourhood organization<br>1 = Does participate in an union, professional or neighbourhood organization                                                                                                                                             | 7        |
| soc_sp_general_0        | integer | General social participation                    | Indicator of participation in a religious, cultural, educational, civic, political, social/charity work association and/or volunteering.                                                    | 0 = Does not take part in a social organization/volunteers<br>1 = Does take part in a social organization/volunteers                                                                                                                                                                                         | 7        |
| soc_sp_nosafety_0       | integer | Non participation due to safety                 | Indicator of whether the participant did not participate in social activities due to safety concerns.                                                                                       | 0 = Safety concerns did not affect participation<br>1 = Did not participate due to safety concerns                                                                                                                                                                                                           | 7        |
| soc_sp_notrans_0        | integer | Non participation due to lack of transportation | Indicator of whether the participant did not participate in social activities due to transport issues.                                                                                      | 0 = Lack of transportation did not affect participation<br>1 = Did not participate due to lack of transportation                                                                                                                                                                                             | 7        |
| soc_sp_isolation_0      | integer | Social isolation                                | Indicator of whether the participant is socially isolated i.e. no/ low social network and no participation in an association (any type, including religious organization and volunteering). | 0 = Not socially isolated, has social network and/ or social participation<br>1 = Socially isolated, no social network and no social participation                                                                                                                                                           | 7        |
| env_nbh_trust_0         | integer | Trust in neighbours                             | Indicator of whether the participant agrees that most people in the area where they live (i.e. in their neighbourhood) can be trusted.                                                      | 0 = People cannot be trusted<br>1 = People can be trusted                                                                                                                                                                                                                                                    | 5        |
| env_nbh_trust_among_0   | integer | Neighbourhood trust                             | Indicator of whether the participant agrees that there is trust among the people in the area where they live (i.e. in their neighbourhood).                                                 | 0 = People do not trust one another<br>1 = People trust one another                                                                                                                                                                                                                                          | 2        |
| env_nbs_help_0          | integer | Helpful neighbours                              | Indicator of whether the participant agrees that neighbors would help them if needed, in case of emergency/trouble.                                                                         | 0 = Neighbours would not help me<br>1 = Neighbours would help me                                                                                                                                                                                                                                             | 5        |
| env_nbs_coop_0          | integer | Cooperating neighbours                          | Indicator of whether the participant agrees that members of the area where they live (i.e. their community or their neighbourhood) help each other out.                                     | 0 = People not willing to help each other<br>1 = People willing to help each other                                                                                                                                                                                                                           | 5        |

| Variable name                 | Format  | Label                                             | Description                                                                                                                                  | Categories                                                                                                                                                                                                                                                                                                                       | # Events |
|-------------------------------|---------|---------------------------------------------------|----------------------------------------------------------------------------------------------------------------------------------------------|----------------------------------------------------------------------------------------------------------------------------------------------------------------------------------------------------------------------------------------------------------------------------------------------------------------------------------|----------|
| env_nbh_values_0              | integer | Neighbourhood values and norms                    | Indicator of whether the participant agrees that people in their neighbourhood share similar values and norms.                               | 1 = Strongly agree that people share similar values and norms<br>2 = Agree that people share similar values and norms<br>3 = Neither agree or disagree that people share similar values and norms<br>4 = Disagree that people share similar values and norms<br>5 = Strongly disagree that people share similar values and norms | 5        |
| env_nbs_along_0               | integer | Neighbours get along                              | Indicator of whether the participant agrees that people in their neighbourhood get along with each other.                                    | 1 = Strongly agree that people get along<br>2 = Agree that people get along<br>3 = Neither agree or disagree that people get along<br>4 = Disagree that people get along<br>5 = Strongly disagree that people get along                                                                                                          | 5        |
| env_nbs_friendly_0            | integer | Friendly neighbours                               | Indicator of whether the participant is asked whether members of the area where their live (i.e. their neighbourhood) are friendly/ polite.  | 1 = People are friendly<br>2 = People are somewhat friendly<br>3 = People are not really friendly<br>4 = People are not friendly                                                                                                                                                                                                 | 1        |
| env_nbh_belong_0              | integer | Belonging to neighbourhood                        | Indicator of whether the participant asked whether they feel a part of the area where they live (i.e. their community, their neighbourhood). | 0 = Does not feel part of area<br>1 = Feels part of area                                                                                                                                                                                                                                                                         | 5        |
| env_nbh_lone_0                | integer | Lonely in neighbourhood                           | Indicator of whether the participant agrees that they feel lonely in the area where they live (i.e. their community, their neighbourhood).   | 1 = Strongly agree that they feel lonely<br>2 = Agree that they feel lonely<br>3 = Neither agree or disagree that they feel lonely<br>4 = Disagree that they feel lonely<br>5 = Strongly disagree that they feel lonely                                                                                                          | 5        |
| env_nbh_comm_0                | integer | Close-knit community                              | Indicator of whether the participant agrees that members of the area in which participant lives are close-knit (community solidarity).       | 1 = Strong neighbourhood solidarity<br>2 = Some neighbourhood solidarity<br>3 = A little neighbourhood solidarity<br>4 = No neighbourhood solidarity                                                                                                                                                                             | 5        |
| env_nbh_violence_0            | integer | Neighbourhood violence                            | Indicator of the participant's perception of violence in their neighbourhood.                                                                | 0 = Violence in neighbourhood<br>1 = No violence in neighbourhood                                                                                                                                                                                                                                                                | 3        |
| env_nbs_anti_0                | integer | Neighbourhood antisocial and aggressive behaviour | Indicator of the participant's perception of antisocial and aggressive behaviour in their neighbourhood.                                     | 0 = Antisocial and aggressive behavior in neighbourhood<br>1 = No antisocial and aggressive behavior in neighbourhood                                                                                                                                                                                                            | 3        |
| socenv_urbanization_grade_0   | integer | Urbanization grade                                | Population density of the residential area (number of residents per km2).                                                                    | N/A                                                                                                                                                                                                                                                                                                                              | 7        |
| socenv_percentage_men_0       | decimal | Percentage of men                                 | Percentage of men in the residential area.                                                                                                   | N/A                                                                                                                                                                                                                                                                                                                              | 7        |
| socenv_percentage_women_0     | decimal | Percentage of women                               | Percentage of women in the residential area.                                                                                                 | N/A                                                                                                                                                                                                                                                                                                                              | 7        |
| socenv_percentage_65_older_0  | decimal | Percentage of residents aged 65 or older          | Percentage of residents aged 65 or older in residential area.                                                                                | N/A                                                                                                                                                                                                                                                                                                                              | 7        |
| socenv_percentage_unmarried_0 | decimal | Percentage of unmarried residents                 | Percentage of unmarried residents in residential area.                                                                                       | N/A                                                                                                                                                                                                                                                                                                                              | 7        |
| socenv_percentage_married_0   | decimal | Percentage of married residents                   | Percentage of married residents in residential area.                                                                                         | N/A                                                                                                                                                                                                                                                                                                                              | 7        |
| socenv_percentage_divorced_0  | decimal | Percentage of divorced residents                  | Percentage of divorced residents in residential area.                                                                                        | N/A                                                                                                                                                                                                                                                                                                                              | 7        |
| socenv_percentage_widowed_0   | decimal | Percentage of widowed residents                   | Percentage of widowed residents in residential area.                                                                                         | N/A                                                                                                                                                                                                                                                                                                                              | 7        |
| socenv_average_hh_size_0      | integer | Average household size                            | Average household size in residential area.                                                                                                  | N/A                                                                                                                                                                                                                                                                                                                              | 7        |
| socenv_avv_dwellings_0        | integer | Average value of dwellings in 1000 euros          | Average value of dwellings in 1000 euros in residential area.                                                                                | N/A                                                                                                                                                                                                                                                                                                                              | 7        |

| Variable name                 | Format  | Label                                             | Description                                                                                                                                                                | Categories                                                                                                                  | # Events |
|-------------------------------|---------|---------------------------------------------------|----------------------------------------------------------------------------------------------------------------------------------------------------------------------------|-----------------------------------------------------------------------------------------------------------------------------|----------|
| socenv_avv_dwelling_m2_0      | integer | Average value of a plot (m2) in euros (dwellings) | Average value of a plot in euros (dwellings) in the residential area.                                                                                                      | N/A                                                                                                                         | 7        |
| socenv_perc_unocc_dwellings_0 | decimal | Percentage of unoccupied dwellings                | Percentage of unoccupied dwellings in residential area.                                                                                                                    | N/A                                                                                                                         | 7        |
| socenv_av_inc1000_0           | integer | Average income in 1000 euros                      | Average income in 1000 euros of residents in residential area.                                                                                                             | N/A                                                                                                                         | 7        |
| socenv_av_inc_0               | integer | Average income in euros                           | Average income in euros of residents in residential area.                                                                                                                  | N/A                                                                                                                         | 7        |
| socenv_av_inc dich1000_0      | integer | Average income in 1000 euros (dichotomized)       | Average income in 1000 euros of residents in residential area (dichotomized: below/above country-specific mean household income).                                          | 0 = Less than or equal to country-specific mean household income<br>1 = Greater than country-specific mean household income | 7        |
| socenv_av_inc dich_0          | integer | Average income in euros (dichotomized)            | Average income in euros of residents in residential area (dichotomized: below/above country-specific mean household income).                                               | 0 = Less than or equal to country-specific mean household income<br>1 = Greater than country-specific mean household income | 7        |
| socenv_av_hhinc_500m_0        | integer | Average household income in euros                 | Average household income in euros in 500 meter street network buffer zone around participants address.                                                                     | N/A                                                                                                                         | 7        |
| socenv_av_hhinc_1000m_0       | integer | Average household income in euros                 | Average household income in euros in 1000 meter street network buffer zone around participants address.                                                                    | N/A                                                                                                                         | 7        |
| socenv_av_hhinc_2000m_0       | integer | Average household income in euros                 | Average household income in euros in 2000 meter street network buffer zone around participants address.                                                                    | N/A                                                                                                                         | 7        |
| socenv_av_hhinc dich_500m_0   | integer | Average household income in euros (dichotomized)  | Average household income in euros in 500 meter street network buffer zone around participants address (dichotomized: below/above country-specific mean household income).  | 0 = Less than or equal to country-specific mean household income<br>1 = Greater than country-specific mean household income | 7        |
| socenv_av_hhinc dich_1000m_0  | integer | Average household income in euros (dichotomized)  | Average household income in euros in 1000 meter street network buffer zone around participants address (dichotomized: below/above country-specific mean household income). | 0 = Less than or equal to country-specific mean household income<br>1 = Greater than country-specific mean household income | 7        |
| socenv_av_hhinc dich_2000m_0  | integer | Average household income in euros (dichotomized)  | Average household income in euros in 2000 meter street network buffer zone around participants address (dichotomized: below/above country-specific mean household income). | 0 = Less than or equal to country-specific mean household income<br>1 = Greater than country-specific mean household income | 7        |
| socenv_av_inc1000Z_0          | integer | Average income in 1000 euros (Z standardised)     | Average income in 1000 euros of residents in residential area (standardized: mean=0 and sd=1).                                                                             | N/A                                                                                                                         | 7        |
| socenv_av_incZ_0              | integer | Average income in euros (Z standardized)          | integer                                                                                                                                                                    | N/A                                                                                                                         | 7        |
| socenv_perc_inc_recipients_0  | decimal | Percentage of income recipients                   | Percentage of income recipients in residential area.                                                                                                                       | N/A                                                                                                                         | 7        |
| socenv_perc_unemployment_0    | decimal | Percentage of unemployed residents                | Percentage of unemployed residents in residential area.                                                                                                                    | N/A                                                                                                                         | 7        |
| socenv_percentage_socsecben_0 | decimal | Percentage of social security beneficiaries       | Percentage of social security beneficiaries in residential area.                                                                                                           | N/A                                                                                                                         | 7        |
| socenv_percentage_disben_0    | decimal | Percentage of residents with disability benefit   | Percentage of residents with a disability benefit in residential area.                                                                                                     | N/A                                                                                                                         | 7        |
| socenv_percentage_unemplben_0 | decimal | Percentage of residents with unemployment benefit | Percentage of residents with a unemployment benefit in residential area.                                                                                                   | N/A                                                                                                                         | 7        |
| socenv_perc_low_education_0   | decimal | Percentage of low educated residents              | Percentage of low educated residents in residential area.                                                                                                                  | N/A                                                                                                                         | 7        |
| socenv_perc_itm_education_0   | decimal | Percentage of intermediate educated residents     | Percentage of intermediate educated residents in residential area.                                                                                                         | N/A                                                                                                                         | 7        |
| socenv_perc_high_education_0  | decimal | Percentage of high educated residents             | Percentage of high educated residents in residential area.                                                                                                                 | N/A                                                                                                                         | 7        |

| Variable name               | Format  | Label                                                           | Description                                                                                                                                           | Categories                                                                                                                                                                                                                          | # Events |
|-----------------------------|---------|-----------------------------------------------------------------|-------------------------------------------------------------------------------------------------------------------------------------------------------|-------------------------------------------------------------------------------------------------------------------------------------------------------------------------------------------------------------------------------------|----------|
| socenv_crimoff_0            | integer | Number of criminal offenses per 1000 residents                  | Number of criminal offenses per 1000 residents in residential area.                                                                                   | N/A                                                                                                                                                                                                                                 | 7        |
| socenv_vandalism_po_0       | integer | Number of vandalism and public disorder per 1000 residents      | Number of vandalism and public disorder per 1000 residents in residential area.                                                                       | N/A                                                                                                                                                                                                                                 | 7        |
| socenv_violentcrim_sexoff_0 | integer | Number of violent crimes and sexual offenses per 1000 residents | Number of violent crimes and sexual offenses per 1000 residents in residential area.                                                                  | N/A                                                                                                                                                                                                                                 | 7        |
| socenv_city_0               | integer | Area indicator: city                                            | City indicator.                                                                                                                                       | N/A                                                                                                                                                                                                                                 | 7        |
| socenv_municipality_0       | integer | Area indicator: municipality                                    | Municipality indicator.                                                                                                                               | N/A                                                                                                                                                                                                                                 | 7        |
| socenv_neighbourhood_0      | integer | Area indicator: neighbourhood                                   | Neighbourhood indicator.                                                                                                                              | N/A                                                                                                                                                                                                                                 | 7        |
| socenv_pc4_0                | integer | Area indicator: 4-digit postal code                             | 4-digit postal code (PC4) indicator.                                                                                                                  | N/A                                                                                                                                                                                                                                 | 7        |
| socenv_pc6_0                | integer | Area indicator: 6-digit postal code                             | 6-digit postal code (PC6) indicator.                                                                                                                  | N/A                                                                                                                                                                                                                                 | 7        |
| socenv_pc5_0                | integer | Area indicator: 5-digit postal code                             | 5-digit postal code (PC5) indicator.                                                                                                                  | N/A                                                                                                                                                                                                                                 | 7        |
| <b>Physcial environment</b> |         |                                                                 |                                                                                                                                                       |                                                                                                                                                                                                                                     |          |
| soc_res_type_0              | integer | Residence type                                                  | Indicator of type of home in which participant lives.                                                                                                 | 1 = Lives in a flat/ apartment<br>2 = Lives in a single-family house (terraced house/ townhouse, semi-detached, detached)<br>3 = Lives in a nursing home, retirement home, home for the elderly<br>4 = Lives on a farm<br>5 = Other | 7        |
| env_nbh_nsf_0               | integer | Feels safe at night                                             | Indicator of whether the participant agrees that they feel safe at night in the area where they live (i.e. their neighbourhood).                      | 0 = Does not feel safe at night<br>1 = Feels safe at night                                                                                                                                                                          | 7        |
| env_nbh_sf_0                | integer | Feels safe in neighbourhood                                     | Indicator of whether the participant agrees that they feel safe in their neighbourhood.                                                               | 0 = Does not feel safe<br>1 = Feels safe                                                                                                                                                                                            | 7        |
| env_nbh_clean_0             | integer | Neighbourhood cleanliness (4-level)                             | Indicator of the participant's perception of the cleanliness (presence of rubbish) of the area where the respondent lives (i.e. their neighbourhood). | 1 = Area not very clean<br>2 = Area not clean<br>3 = Area mostly clean<br>4 = Area clean                                                                                                                                            | 2        |
| env_nbh_clean_dich_0        | integer | Neighbourhood cleanliness (2-level)                             | Indicator of the participant's perception of the cleanliness (presence of rubbish) of the area where the respondent lives (i.e. their neighbourhood). | 0 = Area not clean<br>1 = Area clean                                                                                                                                                                                                | 3        |
| env_nbh_noise_0             | integer | Neighbourhood noisiness (4-level)                               | Indicator of the participant's perception of presence of excessive noise in their neighbourhood.                                                      | 1 = Definitely excessive noise<br>2 = Some excessive noise<br>3 = A little excessive noise<br>4 = No excessive noise                                                                                                                | 2        |
| env_nbh_noise_dich_0        | integer | Neighbourhood noisiness (2-level)                               | Indicator of the participant's perception of presence of excessive noise in their neighbourhood, dichotomized.                                        | 0 = Noisy<br>1 = Not noisy                                                                                                                                                                                                          | 2        |
| env_nbh_traf_noise_0        | integer | Neighbourhood traffic noise                                     | Indicator of the participant's perception of presence of noise from traffic, in their neighbourhood.                                                  | 0 = Traffic noise<br>1 = No traffic noise                                                                                                                                                                                           | 2        |
| env_nbh_gv_0                | integer | Neighbourhood graffiti and vandalism                            | Indicator of the participant's perception of graffiti and/or vandalism in the area where the respondent lives (i.e. their neighbourhood).             | 0 = No graffiti and no vandalism<br>1 = Graffiti and/or vandalism                                                                                                                                                                   | 3        |
| env_nbh_theft_0             | integer | Theft of transportation method                                  | Indicator of the participant's perception of the occurrence of theft of transport vehicle in their neighbourhood.                                     | 0 = Theft of vehicle in neighbourhood<br>1 = No theft of vehicle in neighbourhood                                                                                                                                                   | 3        |
| physenv_ua_ne_grurb_0       | decimal | Distance to green urban areas (Urban Atlas)                     | Absolute distance to the nearest polygon marked as green urban areas from Urban Atlas data.                                                           | N/A                                                                                                                                                                                                                                 | 7        |

| Variable name             | Format  | Label                                                                                               | Description                                                                                                                                        | Categories | # Events |
|---------------------------|---------|-----------------------------------------------------------------------------------------------------|----------------------------------------------------------------------------------------------------------------------------------------------------|------------|----------|
| physenv_ua_ne_forest_0    | decimal | Distance to forest (Urban Atlas)                                                                    | Absolute distance to the nearest polygon marked as forest from Urban Atlas data.                                                                   | N/A        | 7        |
| physenv_ua_ne_water_0     | decimal | Distance to water (Urban Atlas)                                                                     | Absolute distance to the nearest polygon marked as water from Urban Atlas data.                                                                    | N/A        | 7        |
| physenv_ua_ne_agri_0      | decimal | Distance to agricultural land (Urban Atlas)                                                         | Absolute distance to the nearest polygon. No distinction is made between different types of agricultural land from Urban Atlas data.               | N/A        | 7        |
| physenv_ua_ne_ttgr_0      | decimal | Distance to total green spaces (forests + green urban areas) (Urban Atlas)                          | Absolute distance to the nearest polygon. Total of all categories of green spaces (forests + green urban areas) from Urban Atlas data.             | N/A        | 7        |
| physenv_ua_ne_ttbs_0      | decimal | Distance to total blue spaces (water + wetlands) (Urban Atlas)                                      | Absolute distance to the nearest polygon. Total of all categories of blue spaces (water + wetlands) from Urban Atlas data.                         | N/A        | 7        |
| physenv_ua_ne_ttbsgr_0    | decimal | Distance to total blue and green spaces (water, wetlands, forests, green urban areas) (Urban Atlas) | Absolute distance to the nearest polygon. Total of both green and blue spaces (water, wetlands, forests, green urban areas) from Urban Atlas data. | N/A        | 7        |
| physenv_ua_ne_grurb_as_0  | decimal | Area size of green urban areas (Urban Atlas)                                                        | Area size of the nearest polygon marked as green urban areas from Urban Atlas data.                                                                | N/A        | 7        |
| physenv_ua_ne_forest_as_0 | decimal | Area size of forest (Urban Atlas)                                                                   | Area size of the nearest polygon marked as forest from Urban Atlas data.                                                                           | N/A        | 7        |
| physenv_ua_ne_water_as_0  | decimal | Area size of water (Urban Atlas)                                                                    | Area size of the nearest polygon marked as water from Urban Atlas data.                                                                            | N/A        | 7        |
| physenv_ua_ne_agri_as_0   | decimal | Area size agricultural land (Urban Atlas)                                                           | Area size of the nearest polygon. No distinction is made between different types of agricultural land from Urban Atlas data.                       | N/A        | 7        |
| physenv_ua_ne_ttgr_as_0   | decimal | Area size of total green spaces (forests + green urban areas) (Urban Atlas)                         | Area size of the nearest polygon. Total of all categories of green spaces (forests + green urban areas) from Urban Atlas data.                     | N/A        | 7        |
| physenv_ua_ne_ttbs_as_0   | decimal | Area size of total blue spaces (water + wetlands) (Urban Atlas)                                     | Area size of the nearest polygon. Total of all categories of blue spaces (water + wetlands) from Urban Atlas data.                                 | N/A        | 7        |
| physenv_ua_ne_ttbsgr_as_0 | decimal | Area size of total blue and green space (water, wetlands, forests, green urban areas) (Urban Atlas) | Area size of the nearest polygon. Total of both green and blue spaces (water, wetlands, forests, green urban areas) from Urban Atlas data.         | N/A        | 7        |
| physenv_cn_ne_grurb_0     | decimal | Distance to green urban areas (CORINE)                                                              | Absolute distance to the nearest polygon marked as green urban areas from CORINE data.                                                             | N/A        | 7        |
| physenv_cn_ne_forest_0    | decimal | Distance to forest (CORINE)                                                                         | Absolute distance to the nearest polygon marked as forest from CORINE data.                                                                        | N/A        | 7        |
| physenv_cn_ne_water_0     | decimal | Distance to water (CORINE)                                                                          | Absolute distance to the nearest polygon marked as water from CORINE data.                                                                         | N/A        | 7        |
| physenv_cn_ne_agri_0      | decimal | Distance to agricultural land (CORINE)                                                              | Absolute distance to the nearest polygon. No distinction is made between different types of agricultural land from CORINE data.                    | N/A        | 7        |
| physenv_cn_ne_ttgr_0      | decimal | Distance to total green spaces (forests + green urban areas) (CORINE)                               | Absolute distance to the nearest polygon. Total of all categories of green spaces (forests + green urban areas) from CORINE data.                  | N/A        | 7        |
| physenv_cn_ne_ttbs_0      | decimal | Distance to total blue spaces (water + wetlands) (CORINE)                                           | Absolute distance to the nearest polygon. Total of all categories of blue spaces (water + wetlands) from CORINE data.                              | N/A        | 7        |
| physenv_cn_ne_ttbsgr_0    | decimal | Distance to total blue and green spaces (water, wetlands, forests, green urban areas) (CORINE)      | Absolute distance to the nearest polygon. Total of both green and blue spaces (water, wetlands, forests, green urban areas) from CORINE data.      | N/A        | 7        |

| Variable name             | Format  | Label                                                                                                                   | Description                                                                                                                            | Categories | # Events |
|---------------------------|---------|-------------------------------------------------------------------------------------------------------------------------|----------------------------------------------------------------------------------------------------------------------------------------|------------|----------|
| physenv_cn_ne_grurb_as_0  | decimal | Area size of green urban areas (CORINE)                                                                                 | Area size of the nearest polygon marked as green urban areas from CORINE data.                                                         | N/A        | 7        |
| physenv_cn_ne_forest_as_0 | decimal | Area size of forest (CORINE)                                                                                            | Area size of the nearest polygon marked as forest from CORINE data.                                                                    | N/A        | 7        |
| physenv_cn_ne_water_as_0  | decimal | Area size of water (CORINE)                                                                                             | Area size of the nearest polygon marked as water from CORINE data.                                                                     | N/A        | 7        |
| physenv_cn_ne_agri_as_0   | decimal | Area size of agricultural land (CORINE)                                                                                 | Area size of the nearest polygon. No distinction is made between different types of agricultural land from CORINE data.                | N/A        | 7        |
| physenv_cn_ne_ttgr_as_0   | decimal | Area size of total green spaces (forests + green urban areas) (CORINE)                                                  | Area size of the nearest polygon. Total of all categories of green spaces (forests + green urban areas) from CORINE data.              | N/A        | 7        |
| physenv_cn_ne_ttbs_as_0   | decimal | Area size of total blue spaces (water + wetlands) (CORINE)                                                              | Area size of the nearest polygon. Total of all categories of blue spaces (water + wetlands) from CORINE data.                          | N/A        | 7        |
| physenv_cn_ne_ttbsgr_as_0 | decimal | Area size of total blue and green spaces (water, wetlands, forests, green urban areas) (CORINE)                         | Area size of the nearest polygon. Total of both green and blue spaces (water, wetlands, forests, green urban areas) from CORINE data.  | N/A        | 7        |
| physenv_ua_be_facil_0     | decimal | Distance to facilities (Urban Atlas)                                                                                    | Absolute distance to the nearest polygon marked as sports & leisure facilities from Urban Atlas data.                                  | N/A        | 7        |
| physenv_ua_be_facil_as_0  | decimal | Area size of facilities (Urban Atlas)                                                                                   | Area size of the nearest polygon marked as sports & leisure facilities from Urban Atlas data.                                          | N/A        | 7        |
| physenv_cn_be_facil_0     | decimal | Distance to facilities (CORINE)                                                                                         | Absolute distance to the nearest polygon marked as sports & leisure facilities from CORINE data.                                       | N/A        | 7        |
| physenv_cn_be_facil_as_0  | decimal | Area size of facilities (CORINE)                                                                                        | Area size of the nearest polygon marked as sports & leisure facilities from CORINE data.                                               | N/A        | 7        |
| physenv_ua_bf_grurb100_0  | decimal | Area size of green urban areas within 100m buffer (Urban Atlas)                                                         | Area size in m² of green urban areas within 100m buffer from Urban Atlas data.                                                         | N/A        | 7        |
| physenv_ua_bf_forest100_0 | decimal | Area size of forest within 100m buffer (Urban Atlas)                                                                    | Area size in m² of forest within 100m buffer from Urban Atlas data.                                                                    | N/A        | 7        |
| physenv_ua_bf_water100_0  | decimal | Area size of water within 100m buffer (Urban Atlas)                                                                     | Area size in m² of water 100m buffer from Urban Atlas data.                                                                            | N/A        | 7        |
| physenv_ua_bf_agri100_0   | decimal | Area size of agricultural land within 100m buffer (Urban Atlas)                                                         | Area size in m² of agricultural land within 100m buffer from Urban Atlas data.                                                         | N/A        | 7        |
| physenv_ua_bf_ttgr100_0   | decimal | Area size of total green spaces (forests + green urban areas) within 100m buffer (Urban Atlas)                          | Area size in m² of total green spaces (forests + green urban areas) within 100m buffer from Urban Atlas data.                          | N/A        | 7        |
| physenv_ua_bf_ttbs100_0   | decimal | Area size of total blue spaces (water + wetlands) within 100m buffer (Urban Atlas)                                      | Area size in m² of total blue spaces (water + wetlands) within 100m buffer from Urban Atlas data.                                      | N/A        | 7        |
| physenv_ua_bf_ttbsgr100_0 | decimal | Area size of total blue and green spaces (water, wetlands, forests, green urban areas) within 100m buffer (Urban Atlas) | Area size in m² of total blue and green spaces (water, wetlands, forests, green urban areas) within 100m buffer from Urban Atlas data. | N/A        | 7        |
| physenv_cn_bf_grurb100_0  | decimal | Area size of green urban areas within 100m buffer (CORINE)                                                              | Area size in m² of green urban areas within 100m buffer from CORINE data.                                                              | N/A        | 7        |
| physenv_cn_bf_forest100_0 | decimal | Area size of forest within 100m buffer (CORINE)                                                                         | Area size in m² of forest within 100m buffer from CORINE data.                                                                         | N/A        | 7        |
| physenv_cn_bf_water100_0  | decimal | Area size of water within 100m buffer 1990 (CORINE)                                                                     | Area size in m² of water within 100m buffer from CORINE data.                                                                          | N/A        | 7        |
| physenv_cn_bf_agri100_0   | decimal | Area size of agricultural land within 100m buffer (CORINE)                                                              | Area size in m² of agricultural land within 100m buffer from CORINE data.                                                              | N/A        | 7        |

| Variable name             | Format  | Label                                                                                                                   | Description                                                                                                                                        | Categories | # Events |
|---------------------------|---------|-------------------------------------------------------------------------------------------------------------------------|----------------------------------------------------------------------------------------------------------------------------------------------------|------------|----------|
| physenv_cn_bf_ttgr100_0   | decimal | Area size of total green spaces (forests + green urban areas) within 100m buffer (CORINE)                               | Area size in m <sup>2</sup> of total green spaces (forests + green urban areas) within 100m buffer from CORINE data.                               | N/A        | 7        |
| physenv_cn_bf_ttbs100_0   | decimal | Area size of total blue spaces (water + wetlands) within 100m buffer (CORINE)                                           | Area size in m <sup>2</sup> of total blue spaces (water + wetlands) 100m buffer from CORINE data.                                                  | N/A        | 7        |
| physenv_cn_bf_ttbsgr100_0 | decimal | Area size of total blue and green spaces (water, wetlands, forests, green urban areas) within 100m buffer (CORINE)      | Area size in m <sup>2</sup> of total blue and green spaces (water, wetlands, forests, green urban areas) within 100m buffer from CORINE data.      | N/A        | 7        |
| physenv_ua_bf_grurb400_0  | decimal | Area size of green urban areas within 400m buffer (Urban Atlas)                                                         | Area size in m <sup>2</sup> of green urban areas within 400m buffer from Urban Atlas data.                                                         | N/A        | 7        |
| physenv_ua_bf_forest400_0 | decimal | Area size of forest within 400m buffer (Urban Atlas)                                                                    | Area size in m <sup>2</sup> of forest within 400m buffer from Urban Atlas data.                                                                    | N/A        | 7        |
| physenv_ua_bf_water400_0  | decimal | Area size of water within 400m buffer (Urban Atlas)                                                                     | Area size in m <sup>2</sup> of water within 400m buffer from Urban Atlas data.                                                                     | N/A        | 7        |
| physenv_ua_bf_agri400_0   | decimal | Area size of agricultural land within 400m buffer (Urban Atlas)                                                         | Area size in m <sup>2</sup> of agricultural land within 400m buffer from Urban Atlas data.                                                         | N/A        | 7        |
| physenv_ua_bf_ttgr400_0   | decimal | Area size of total green spaces (forests + green urban areas) within 400m buffer (Urban Atlas)                          | Area size in m <sup>2</sup> of total green spaces (forests + green urban areas) within 400m buffer from Urban Atlas data.                          | N/A        | 7        |
| physenv_ua_bf_ttbs400_0   | decimal | Area size of total blue spaces (water + wetlands) within 400m buffer (Urban Atlas)                                      | Area size in m <sup>2</sup> of total blue spaces (water + wetlands) within 400m buffer from Urban Atlas data.                                      | N/A        | 7        |
| physenv_ua_bf_ttbsgr400_0 | decimal | Area size of total blue and green spaces (water, wetlands, forests, green urban areas) within 400m buffer (Urban Atlas) | Area size in m <sup>2</sup> of total blue and green spaces (water, wetlands, forests, green urban areas) within 400m buffer from Urban Atlas data. | N/A        | 7        |
| physenv_cn_bf_grurb400_0  | decimal | Area size of green urban areas within 400m buffer (CORINE)                                                              | Area size in m <sup>2</sup> of green urban areas within 400m buffer from CORINE data.                                                              | N/A        | 7        |
| physenv_cn_bf_forest400_0 | decimal | Area size of forest within 400m buffer (CORINE)                                                                         | Area size in m <sup>2</sup> of forest within 400m buffer from CORINE data.                                                                         | N/A        | 7        |
| physenv_cn_bf_water400_0  | decimal | Area size of water within 400m buffer (CORINE)                                                                          | Area size in m <sup>2</sup> of water within 400m buffer from CORINE data.                                                                          | N/A        | 7        |
| physenv_cn_bf_agri400_0   | decimal | Area size of agricultural land within 400m buffer (CORINE)                                                              | Area size in m <sup>2</sup> of agricultural land within 400m buffer from CORINE data.                                                              | N/A        | 7        |
| physenv_cn_bf_ttgr400_0   | decimal | Area size of total green spaces (forests + green urban areas) within 400m buffer (CORINE)                               | Area size in m <sup>2</sup> of total green spaces (forests + green urban areas) within 400m buffer from CORINE data.                               | N/A        | 7        |
| physenv_cn_bf_ttbs400_0   | decimal | Area size of total blue spaces (water + wetlands) within 400m buffer (CORINE)                                           | Area size in m <sup>2</sup> of total blue spaces (water + wetlands) within 400m buffer from CORINE data.                                           | N/A        | 7        |
| physenv_cn_bf_ttbsgr400_0 | decimal | Area size of total blue and green spaces (water, wetlands, forests, green urban areas) within 400m buffer (CORINE)      | Area size in m <sup>2</sup> of total blue and green spaces (water, wetlands, forests, green urban areas) within 400m buffer from CORINE data.      | N/A        | 7        |
| physenv_ua_bf_facil400_0  | decimal | Area size of sports & leisure facilities within 400m buffer (Urban Atlas)                                               | Area size in m <sup>2</sup> of sports & leisure facilities within 400m buffer from Urban Atlas data.                                               | N/A        | 7        |
| physenv_cn_bf_facil400_0  | decimal | Area size of sports & leisure facilities within 400m buffer (CORINE)                                                    | Area size in m <sup>2</sup> of sports & leisure facilities within 400m buffer from CORINE data.                                                    | N/A        | 7        |
| physenv_ua_bf_grurb800_0  | decimal | Area size of green urban areas within 800m buffer (Urban Atlas)                                                         | Area size in m <sup>2</sup> of green urban areas within 800m buffer from Urban Atlas data.                                                         | N/A        | 7        |
| physenv_ua_bf_forest800_0 | decimal | Area size of forest within 800m buffer (Urban Atlas)                                                                    | Area size in m <sup>2</sup> of forest within 800m buffer from Urban Atlas data.                                                                    | N/A        | 7        |
| physenv_ua_bf_water800_0  | decimal | Area size of water within 800 m buffer (Urban Atlas)                                                                    | Area size in m <sup>2</sup> of water within 800m buffer from Urban Atlas data.                                                                     | N/A        | 7        |

| Variable name              | Format  | Label                                                                                                                    | Description                                                                                                                             | Categories | # Events |
|----------------------------|---------|--------------------------------------------------------------------------------------------------------------------------|-----------------------------------------------------------------------------------------------------------------------------------------|------------|----------|
| physenv_ua_bf_agri800_0    | decimal | Area size of m² of agricultural land within 800m buffer (Urban Atlas)                                                    | Area size in m² of agricultural land within 800m buffer from Urban Atlas data.                                                          | N/A        | 7        |
| physenv_ua_bf_ttgr800_0    | decimal | Area size of total green spaces (forests + green urban areas) within 800m buffer (Urban Atlas)                           | Area size in m² of total green spaces (forests + green urban areas) within 800m buffer from Urban Atlas data.                           | N/A        | 7        |
| physenv_ua_bf_ttbs800_0    | decimal | Area size of total blue spaces (water + wetlands) within 800m buffer (Urban Atlas)                                       | Area size in m² of blue spaces within 800m buffer from Urban Atlas data.                                                                | N/A        | 7        |
| physenv_ua_bf_ttbsgr800_0  | decimal | Area size of total blue and green spaces (water, wetlands, forests, green urban areas) within 800m buffer (Urban Atlas)  | Area size in m² of total blue and green spaces (water, wetlands, forests, green urban areas) within 800m buffer from Urban Atlas data.  | N/A        | 7        |
| physenv_cn_bf_grurb800_0   | decimal | Area size of green urban areas within 800m buffer (CORINE)                                                               | Area size in m² of green urban areas within 800m buffer from CORINE data.                                                               | N/A        | 7        |
| physenv_cn_bf_forest800_0  | decimal | Area size of forest within 800m buffer (CORINE)                                                                          | Area size in m² of forest within 800m buffer from CORINE data.                                                                          | N/A        | 7        |
| physenv_cn_bf_water800_0   | decimal | Area size of water within 800m buffer (CORINE)                                                                           | Area size in m² of water within 800m buffer from CORINE data.                                                                           | N/A        | 7        |
| physenv_cn_bf_agri800_0    | decimal | Area size of agricultural land within 800m buffer (CORINE)                                                               | Area size in m² of agricultural land within 800m buffer from CORINE data.                                                               | N/A        | 7        |
| physenv_cn_bf_ttgr800_0    | decimal | Area size of total green spaces (forests + green urban areas) within 800m buffer (CORINE)                                | Area size in m² of total green spaces (forests + green urban areas) within 800m buffer from CORINE data.                                | N/A        | 7        |
| physenv_cn_bf_ttbs800_0    | decimal | Area size of total blue spaces (water + wetlands) within 800m buffer (CORINE)                                            | Area size in m² of total blue spaces (water + wetlands) within 800m buffer from CORINE data.                                            | N/A        | 7        |
| physenv_cn_bf_ttbsgr800_0  | decimal | Area size of total blue and green spaces (water, wetlands, forests, green urban areas) within 800m buffer (CORINE)       | Area size in m² of total blue and green spaces (water, wetlands, forests, green urban areas) within 800m buffer from CORINE data.       | N/A        | 7        |
| physenv_ua_bf_facil800_0   | decimal | Area size of sports & leisure facilities within 800m buffer (Urban Atlas)                                                | Area size in m² of sports & leisure facilities within 800m buffer from Urban Atlas data.                                                | N/A        | 7        |
| physenv_cn_bf_facil800_0   | decimal | Area size of sports & leisure facilities within 800m buffer (CORINE)                                                     | Area size in m² of sports & leisure facilities within 800m buffer from CORINE data.                                                     | N/A        | 7        |
| physenv_ua_bf_grurb1000_0  | decimal | Area size of green urban areas within 1000m buffer (Urban Atlas)                                                         | Area size in m² of green urban areas within 1000m buffer from Urban Atlas data.                                                         | N/A        | 7        |
| physenv_ua_bf_forest1000_0 | decimal | Area size of forest within 1000m buffer (Urban Atlas)                                                                    | Area size in m² of forest within 1000m buffer from Urban Atlas data.                                                                    | N/A        | 7        |
| physenv_ua_bf_water1000_0  | decimal | Area size of water within 1000m buffer (Urban Atlas)                                                                     | Area size in m² of water within 1000m buffer from Urban Atlas data.                                                                     | N/A        | 7        |
| physenv_ua_bf_agri1000_0   | decimal | Area size of agricultural land within 1000m buffer (Urban Atlas)                                                         | Area size in m² of agricultural land within 1000m buffer from Urban Atlas data.                                                         | N/A        | 7        |
| physenv_ua_bf_ttgr1000_0   | decimal | Area size of total green spaces (forests + green urban areas) within 1000m buffer (Urban Atlas)                          | Area size in m² of total green spaces (forests + green urban areas) within 1000m buffer from Urban Atlas data.                          | N/A        | 7        |
| physenv_ua_bf_ttbs1000_0   | decimal | Area size of total blue spaces (water + wetlands) within 1000m buffer (Urban Atlas)                                      | Area size in m² of total blue spaces (water + wetlands) within 1000m buffer from Urban Atlas data.                                      | N/A        | 7        |
| physenv_ua_bf_ttbsgr1000_0 | decimal | Area size of total blue and green spaces (water, wetlands, forests, green urban areas) within 1000m buffer (Urban Atlas) | Area size in m² of total blue and green spaces (water, wetlands, forests, green urban areas) within 1000m buffer from Urban Atlas data. | N/A        | 7        |
| physenv_cn_bf_grurb1000_0  | decimal | Area size of green urban areas within 1000m buffer (CORINE)                                                              | Area size in m² of green urban areas within 1000m buffer from CORINE data.                                                              | N/A        | 7        |
| physenv_cn_bf_forest1000_0 | decimal | Area size of forest within 1000m buffer (CORINE)                                                                         | Area size in m² of forest within 1000m buffer from CORINE data.                                                                         | N/A        | 7        |

| Variable name              | Format  | Label                                                                                                                    | Description                                                                                                                             | Categories | # Events |
|----------------------------|---------|--------------------------------------------------------------------------------------------------------------------------|-----------------------------------------------------------------------------------------------------------------------------------------|------------|----------|
| physenv_cn_bf_water1000_0  | decimal | Area size of water within 1000m buffer (CORINE)                                                                          | Area size in m² of water within 1000m buffer from CORINE data.                                                                          | N/A        | 7        |
| physenv_cn_bf_agri1000_0   | decimal | Area size of agricultural land within 1000m buffer (CORINE)                                                              | Area size in m² of agricultural land within 1000m buffer from CORINE data.                                                              | N/A        | 7        |
| physenv_cn_bf_ttgr1000_0   | decimal | Area size of total green spaces (forests + green urban areas) within 1000m buffer (CORINE)                               | Area size in m² of total green spaces (forests + green urban areas) within 1000m buffer from CORINE data.                               | N/A        | 7        |
| physenv_cn_bf_ttbs1000_0   | decimal | Area size of total blue spaces (water + wetlands) within 1000m buffer (CORINE)                                           | Area size in m² of total blue spaces (water + wetlands) within 1000m buffer from CORINE data.                                           | N/A        | 7        |
| physenv_cn_bf_ttbsgr1000_0 | decimal | Area size of total blue and green spaces (water, wetlands, forests, green urban areas) within 1000m buffer (CORINE)      | Area size in m² of total blue and green spaces (water, wetlands, forests, green urban areas) within 1000m buffer from CORINE data.      | N/A        | 7        |
| physenv_ua_bf_facil1000_0  | decimal | Area size of sports & leisure facilities within 1000m buffer (Urban Atlas)                                               | Area size in m² of sports & leisure facilities within 1000m buffer from Urban Atlas data.                                               | N/A        | 7        |
| physenv_cn_bf_facil1000_0  | decimal | Area size of sports & leisure facilities within 1000m buffer (CORINE)                                                    | Area size in m² of sports & leisure facilities within 1000m buffer from CORINE data.                                                    | N/A        | 7        |
| physenv_ua_bf_grurb1600_0  | decimal | Area size of green urban areas within 1600m buffer (Urban Atlas)                                                         | Area size in m² of green urban areas within 1600m buffer from Urban Atlas data.                                                         | N/A        | 7        |
| physenv_ua_bf_forest1600_0 | decimal | Area size of forest within 1600m buffer (Urban Atlas)                                                                    | Area size in m² of forest within 1600m buffer from Urban Atlas data.                                                                    | N/A        | 7        |
| physenv_ua_bf_water1600_0  | decimal | Area size of water within 1600m buffer (Urban Atlas)                                                                     | Area size in m² of water within 1600m buffer from Urban Atlas data.                                                                     | N/A        | 7        |
| physenv_ua_bf_agri1600_0   | decimal | Area size of agricultural land within 1600m buffer (Urban Atlas)                                                         | Area size in m² of agricultural land within 1600m buffer from Urban Atlas data.                                                         | N/A        | 7        |
| physenv_ua_bf_ttgr1600_0   | decimal | Area size of total green spaces (forests + green urban areas) within 1600m buffer (Urban Atlas)                          | Area size in m² of total green spaces (forests + green urban areas) within 1600m buffer from Urban Atlas data.                          | N/A        | 7        |
| physenv_ua_bf_ttbs1600_0   | decimal | Area size of total blue spaces (water + wetlands) within 1600m buffer (Urban Atlas)                                      | Area size in m² of total blue spaces (water + wetlands) within 1600m buffer from Urban Atlas data.                                      | N/A        | 7        |
| physenv_ua_bf_ttbsgr1600_0 | decimal | Area size of total blue and green spaces (water, wetlands, forests, green urban areas) within 1600m buffer (Urban Atlas) | Area size in m² of total blue and green spaces (water, wetlands, forests, green urban areas) within 1600m buffer from Urban Atlas data. | N/A        | 7        |
| physenv_cn_bf_grurb1600_0  | decimal | Area size of green urban areas within 1600m buffer (CORINE)                                                              | Area size in m² of green urban areas within 1600m buffer from CORINE data.                                                              | N/A        | 7        |
| physenv_cn_bf_forest1600_0 | decimal | Area size of forest within 1600m buffer (CORINE)                                                                         | Area size in m² of forest within 1600m buffer from CORINE data.                                                                         | N/A        | 7        |
| physenv_cn_bf_water1600_0  | decimal | Area size of water within 1600m buffer (CORINE)                                                                          | Area size in m² of water within 1600m buffer from CORINE data.                                                                          | N/A        | 7        |
| physenv_cn_bf_agri1600_0   | decimal | Area size of agricultural land within 1600m buffer (CORINE)                                                              | Area size in m² of agricultural land within 1600m buffer from CORINE data.                                                              | N/A        | 7        |
| physenv_cn_bf_ttgr1600_0   | decimal | Area size of total green spaces (forests + green urban areas) within 1600m buffer (CORINE)                               | Area size in m² of total green spaces (forests + green urban areas) within 1600m buffer from CORINE data.                               | N/A        | 7        |
| physenv_cn_bf_ttbs1600_0   | decimal | Area size of total blue spaces (water + wetlands) within 1600m buffer (CORINE)                                           | Area size in m² of total blue spaces within 1600m buffer from CORINE data.                                                              | N/A        | 7        |
| physenv_cn_bf_ttbsgr1600_0 | decimal | Area size of total blue and green spaces (water, wetlands, forests, green urban areas) within 1600m buffer (CORINE)      | Area size in m² of total blue and green spaces (water, wetlands, forests, green urban areas) within 1600m buffer from CORINE data.      | N/A        | 7        |
| physenv_ua_bf_facil1600_0  | decimal | Area size of sports & leisure facilities within 1600m buffer (Urban Atlas)                                               | Area size in m² of sports & leisure facilities within 1600m buffer from Urban Atlas data.                                               | N/A        | 7        |

| Variable name               | Format  | Label                                                                          | Description                                                                                                            | Categories | # Events |
|-----------------------------|---------|--------------------------------------------------------------------------------|------------------------------------------------------------------------------------------------------------------------|------------|----------|
| physenv_cn_bf_facil1600_0   | decimal | Area size of sports & leisure facilities within 1600m buffer (CORINE)          | Area size in m <sup>2</sup> of sports & leisure facilities within 1600m buffer from CORINE data.                       | N/A        | 7        |
| physenv_ua_bf_facil3000_0   | decimal | Area size of sports & leisure facilities within 3000m buffer (Urban Atlas)     | Area size in m <sup>2</sup> of sports & leisure facilities within 3000m buffer from Urban Atlas data.                  | N/A        | 7        |
| physenv_ua_bf_lu100_0       | decimal | Land use mix within 100m buffer (Urban Atlas)                                  | Land use mix in m <sup>2</sup> within a 100m buffer. It is calculated using an entropy formula from Urban Atlas data.  | N/A        | 7        |
| physenv_ua_bf_lu100_bu_0    | decimal | Area size of built-up area within 100m buffer (Urban Atlas)                    | Area size in m <sup>2</sup> of built-up areas within 100m buffer from Urban Atlas data.                                | N/A        | 7        |
| physenv_ua_bf_lu100_ic_0    | decimal | Area size of industrial and commercial area within 100m buffer (Urban Atlas)   | Area size in m <sup>2</sup> of industrial and commercial areas within 100m buffer from Urban Atlas data.               | N/A        | 7        |
| physenv_ua_bf_lu100_in_0    | decimal | Area size of infrastructure area within 100m buffer (Urban Atlas)              | Area size in m <sup>2</sup> of infrastructure areas within 100m buffer from Urban Atlas data.                          | N/A        | 7        |
| physenv_ua_bf_lu100_po_0    | decimal | Area size of port area within 100m buffer (Urban Atlas)                        | Area size in m <sup>2</sup> of ports (airports and sea ports) within 100m buffer from Urban Atlas data.                | N/A        | 7        |
| physenv_ua_bf_lu100_grurb_0 | decimal | Area size of green urban areas (land use) within 100m buffer (Urban Atlas)     | Area size in m <sup>2</sup> of green urban areas (land use) within 100m buffer from Urban Atlas data.                  | N/A        | 7        |
| physenv_ua_bf_lu100_facil_0 | decimal | Area size of sports & leisure facilities area within 100m buffer (Urban Atlas) | Area size in m <sup>2</sup> of sports & leisure facilities within 100m buffer from Urban Atlas data.                   | N/A        | 7        |
| physenv_ua_bf_lu100_agri_0  | decimal | Area size of agricultural land (land use) within 100m buffer (Urban Atlas)     | Area size in m <sup>2</sup> of agricultural land (land use) within 100m buffer from Urban Atlas data.                  | N/A        | 7        |
| physenv_ua_bf_lu100_on_0    | decimal | Area size of other natural areas within 100m buffer (Urban Atlas)              | Area size in m <sup>2</sup> of other natural areas within 100m buffer from Urban Atlas data.                           | N/A        | 7        |
| physenv_ua_bf_lu100_water_0 | decimal | Area size of water within 100m buffer (Urban Atlas)                            | Area size in m <sup>2</sup> of water within 100m buffer from Urban Atlas data.                                         | N/A        | 7        |
| physenv_ua_bf_lu100_ot_0    | decimal | Area size of other areas within 100m buffer (Urban Atlas)                      | Area size in m <sup>2</sup> of other areas within 100m buffer from Urban Atlas data.                                   | N/A        | 7        |
| physenv_cn_bf_lu100_0       | decimal | Land use mix within 100m buffer (CORINE)                                       | Land use mix in m <sup>2</sup> within a 100m buffer. It is calculated using an entropy formula from CORINE data.       | N/A        | 7        |
| physenv_cn_bf_lu100_bu_0    | decimal | Area size of built-up area within 100m buffer (CORINE)                         | Area size in m <sup>2</sup> of built-up areas within 100 buffer from CORINE data.                                      | N/A        | 7        |
| physenv_cn_bf_lu100_ic_0    | decimal | Area size of industrial and commercial area within 100m buffer (CORINE)        | Area size in m <sup>2</sup> of industrial and commercial areas within 100m buffer from CORINE data.                    | N/A        | 7        |
| physenv_cn_bf_lu100_in_0    | decimal | Area size of infrastructure area within 100m buffer (CORINE)                   | Area size in m <sup>2</sup> of infrastructure areas within 100m buffer from CORINE data.                               | N/A        | 7        |
| physenv_cn_bf_lu100_po_0    | decimal | Area size of port area within 100m buffer (CORINE)                             | Area size in m <sup>2</sup> of ports (airports and sea ports) within 100m buffer from CORINE data.                     | N/A        | 7        |
| physenv_cn_bf_lu100_grurb_0 | decimal | Area size of green urban areas (land use) within 100m buffer (CORINE)          | Area size in m <sup>2</sup> of green urban areas (land use) within 100m buffer from CORINE data.                       | N/A        | 7        |
| physenv_cn_bf_lu100_facil_0 | decimal | Area size of sports & leisure facilities area within 100m buffer (CORINE)      | Area size in m <sup>2</sup> of sports & leisure facilities within 100 buffer from CORINE data.                         | N/A        | 7        |
| physenv_cn_bf_lu100_agri_0  | decimal | Area size of agricultural land (land use) within 100m buffer (CORINE)          | Area size in m <sup>2</sup> of agricultural land (land use) within 100m buffer from CORINE data.                       | N/A        | 7        |
| physenv_cn_bf_lu100_on_0    | decimal | Area size of other natural areas within 100m buffer (CORINE)                   | Area size in m <sup>2</sup> of other natural areas within 100m buffer from CORINE data.                                | N/A        | 7        |
| physenv_cn_bf_lu100_water_0 | decimal | Area size of water within 100m buffer (CORINE)                                 | Area size in m <sup>2</sup> of water within 100m buffer from CORINE data.                                              | N/A        | 7        |
| physenv_cn_bf_lu100_ot_0    | decimal | Area size of other areas within 100m buffer (CORINE)                           | Area size in m <sup>2</sup> of other areas within 100m buffer from CORINE data.                                        | N/A        | 7        |
| physenv_ua_bf_lu400_0       | decimal | Land use mix within 400m buffer (Urban Atlas)                                  | Land use mix in m <sup>2</sup> within a 400mm buffer. It is calculated using an entropy formula from Urban Atlas data. | N/A        | 7        |

| Variable name               | Format  | Label                                                                          | Description                                                                                                           | Categories | # Events |
|-----------------------------|---------|--------------------------------------------------------------------------------|-----------------------------------------------------------------------------------------------------------------------|------------|----------|
| physenv_ua_bf_lu400_bu_0    | decimal | Area size of built-up area within 400m buffer (Urban Atlas)                    | Area size in m <sup>2</sup> of built-up areas within 400m buffer from Urban Atlas data.                               | N/A        | 7        |
| physenv_ua_bf_lu400_ic_0    | decimal | Area size of industrial and commercial area within 400m buffer (Urban Atlas)   | Area size in m <sup>2</sup> of industrial and commercial areas within 400m buffer from Urban Atlas data.              | N/A        | 7        |
| physenv_ua_bf_lu400_in_0    | decimal | Area size of infrastructure area within 400m buffer (Urban Atlas)              | Area size in m <sup>2</sup> of infrastructure areas within 400m buffer from Urban Atlas data.                         | N/A        | 7        |
| physenv_ua_bf_lu400_po_0    | decimal | Area size of port area within 400m buffer (Urban Atlas)                        | Area size in m <sup>2</sup> of ports (airports and sea ports) within 400m buffer from Urban Atlas data.               | N/A        | 7        |
| physenv_ua_bf_lu400_grurb_0 | decimal | Area size of green urban areas (land use) within 400m buffer (Urban Atlas)     | Area size in m <sup>2</sup> of green urban areas (land use) within 400m buffer from Urban Atlas data.                 | N/A        | 7        |
| physenv_ua_bf_lu400_facil_0 | decimal | Area size of sports & leisure facilities area within 400m buffer (Urban Atlas) | Area size in m <sup>2</sup> of sports & leisure facilities within 400m buffer from Urban Atlas data.                  | N/A        | 7        |
| physenv_ua_bf_lu400_agri_0  | decimal | Area size of agricultural land (land use) within 400m buffer (Urban Atlas)     | Area size in m <sup>2</sup> of agricultural land (land use) within 400m buffer from Urban Atlas data.                 | N/A        | 7        |
| physenv_ua_bf_lu400_on_0    | decimal | Area size of other natural areas within 400m buffer (Urban Atlas)              | Area size in m <sup>2</sup> of other natural areas within 400m buffer from Urban Atlas data.                          | N/A        | 7        |
| physenv_ua_bf_lu400_water_0 | decimal | Area size of water within 400m buffer (Urban Atlas)                            | Area size in m <sup>2</sup> of water within 400m buffer from Urban Atlas data.                                        | N/A        | 7        |
| physenv_ua_bf_lu400_ot_0    | decimal | Area size of other areas within 400m buffer (Urban Atlas)                      | Area size in m <sup>2</sup> of other areas within 400m buffer from Urban Atlas data.                                  | N/A        | 7        |
| physenv_cn_bf_lu400_0       | decimal | Land use mix within 400m buffer (CORINE)                                       | Land use mix in m <sup>2</sup> within a 400m buffer. It is calculated using an entropy formula from CORINE data.      | N/A        | 7        |
| physenv_cn_bf_lu400_bu_0    | decimal | Area size of built-up area within 400m buffer (CORINE)                         | Area size in m <sup>2</sup> of built-up areas within 400m buffer from CORINE data.                                    | N/A        | 7        |
| physenv_cn_bf_lu400_ic_0    | decimal | Area size of industrial and commercial area within 400m buffer (CORINE)        | Area size in m <sup>2</sup> of industrial and commercial areas within 400m buffer from CORINE data.                   | N/A        | 7        |
| physenv_cn_bf_lu400_in_0    | decimal | Area size of infrastructure area within 400m buffer (CORINE)                   | Area size in m <sup>2</sup> of infrastructure areas within 400m buffer from CORINE data.                              | N/A        | 7        |
| physenv_cn_bf_lu400_po_0    | decimal | Area size of port area within 400m buffer (CORINE)                             | Area size in m <sup>2</sup> of ports (airports and sea ports) within 400m buffer from CORINE data.                    | N/A        | 7        |
| physenv_cn_bf_lu400_grurb_0 | decimal | Area size of green urban areas (land use) within 400m buffer (CORINE)          | Area size in m <sup>2</sup> of green urban areas (land use) within 400m buffer from CORINE data.                      | N/A        | 7        |
| physenv_cn_bf_lu400_facil_0 | decimal | Area size of sports & leisure facilities area within 400m buffer (CORINE)      | Area size in m <sup>2</sup> of sports & leisure facilities within 400m buffer from CORINE data.                       | N/A        | 7        |
| physenv_cn_bf_lu400_agri_0  | decimal | Area size of agricultural land (land use) within 400m buffer (CORINE)          | Area size in m <sup>2</sup> of agricultural land (land use) within 400m buffer from CORINE data.                      | N/A        | 7        |
| physenv_cn_bf_lu400_on_0    | decimal | Area size of other natural areas within 400m buffer (CORINE)                   | Area size in m <sup>2</sup> of other natural areas within 400m buffer from CORINE data.                               | N/A        | 7        |
| physenv_cn_bf_lu400_water_0 | decimal | Area size of water within 400m buffer (CORINE)                                 | Area size in m <sup>2</sup> of water within 400m buffer from CORINE data.                                             | N/A        | 7        |
| physenv_cn_bf_lu400_ot_0    | decimal | Area size of other areas within 400m buffer (CORINE)                           | Area size in m <sup>2</sup> of other areas within 400m buffer from CORINE data.                                       | N/A        | 7        |
| physenv_ua_bf_lu800_0       | decimal | Land use mix within 800m buffer (Urban Atlas)                                  | Land use mix in m <sup>2</sup> within a 800m buffer. It is calculated using an entropy formula from Urban Atlas data. | N/A        | 7        |
| physenv_ua_bf_lu800_bu_0    | decimal | Area size of built-up area within 800m buffer (Urban Atlas)                    | Area size in m <sup>2</sup> of built-up areas within 800m buffer from Urban Atlas data.                               | N/A        | 7        |
| physenv_ua_bf_lu800_ic_0    | decimal | Area size of industrial and commercial area within 800m buffer (Urban Atlas)   | Area size in m <sup>2</sup> of industrial and commercial areas within 800m buffer from Urban Atlas data.              | N/A        | 7        |
| physenv_ua_bf_lu800_in_0    | decimal | Area size of infrastructure area within 800m buffer (Urban Atlas)              | Area size in m <sup>2</sup> of infrastructure areas within 800m buffer from Urban Atlas data.                         | N/A        | 7        |
| physenv_ua_bf_lu800_po_0    | decimal | Area size of port area within 800m buffer (Urban Atlas)                        | Area size in m <sup>2</sup> of ports (airports and sea ports) within 800m buffer from Urban Atlas data.               | N/A        | 7        |

| Variable name                | Format  | Label                                                                           | Description                                                                                                            | Categories | # Events |
|------------------------------|---------|---------------------------------------------------------------------------------|------------------------------------------------------------------------------------------------------------------------|------------|----------|
| physenv_ua_bf_lu800_grurb_0  | decimal | Area size of green urban areas (land use) within 800m buffer (Urban Atlas)      | Area size in m <sup>2</sup> of green urban areas (land use) within 800m buffer from Urban Atlas data.                  | N/A        | 7        |
| physenv_ua_bf_lu800_facil_0  | decimal | Area size of sports & leisure facilities area within 800m buffer (Urban Atlas)  | Area size in m <sup>2</sup> of sports & leisure facilities within 800m buffer from Urban Atlas data.                   | N/A        | 7        |
| physenv_ua_bf_lu800_agri_0   | decimal | Area size of agricultural land (land use) within 800m buffer (Urban Atlas)      | Area size in m <sup>2</sup> of agricultural land (land use) within 800m buffer from Urban Atlas data.                  | N/A        | 7        |
| physenv_ua_bf_lu800_on_0     | decimal | Area size of other natural areas within 800m buffer (Urban Atlas)               | Area size in m <sup>2</sup> of other natural areas within 800m buffer from Urban Atlas data.                           | N/A        | 7        |
| physenv_ua_bf_lu800_water_0  | decimal | Area size of water within 800m buffer (Urban Atlas)                             | Area size in m <sup>2</sup> of water within 800m buffer from Urban Atlas data.                                         | N/A        | 7        |
| physenv_ua_bf_lu800_ot_0     | decimal | Area size of other areas within 800m buffer (Urban Atlas)                       | Area size in m <sup>2</sup> of other areas within 800m buffer from Urban Atlas data.                                   | N/A        | 7        |
| physenv_cn_bf_lu800_0        | decimal | Land use mix within 800m buffer (CORINE)                                        | Land use mix in m <sup>2</sup> within a 800m buffer. It is calculated using an entropy formula from CORINE data.       | N/A        | 7        |
| physenv_cn_bf_lu800_bu_0     | decimal | Area size of built-up area within 800m buffer (CORINE)                          | Area size in m <sup>2</sup> of built-up areas within 800m buffer from CORINE data.                                     | N/A        | 7        |
| physenv_cn_bf_lu800_ic_0     | decimal | Area size of industrial and commercial area within 800m buffer (CORINE)         | Area size in m <sup>2</sup> of industrial and commercial areas within 800m buffer from CORINE data.                    | N/A        | 7        |
| physenv_cn_bf_lu800_in_0     | decimal | Area size of infrastructure area within 800m buffer (CORINE)                    | Area size in m <sup>2</sup> of infrastructure areas within 800m buffer from CORINE data.                               | N/A        | 7        |
| physenv_cn_bf_lu800_po_0     | decimal | Area size of port area within 800m buffer (CORINE)                              | Area size in m <sup>2</sup> of ports (airports and sea ports) within 800m buffer from CORINE data.                     | N/A        | 7        |
| physenv_cn_bf_lu800_grurb_0  | decimal | Area size of green urban areas (land use) within 800m buffer (CORINE)           | Area size in m <sup>2</sup> of green urban areas (land use) within 800m buffer from CORINE data.                       | N/A        | 7        |
| physenv_cn_bf_lu800_facil_0  | decimal | Area size of sports & leisure facilities area within 800m buffer (CORINE)       | Area size in m <sup>2</sup> of sports & leisure facilities within 800m buffer from CORINE data.                        | N/A        | 7        |
| physenv_cn_bf_lu800_agri_0   | decimal | Area size of agricultural land (land use) within 800m buffer (CORINE)           | Area size in m <sup>2</sup> of agricultural land (land use) within 800m buffer from CORINE data.                       | N/A        | 7        |
| physenv_cn_bf_lu800_on_0     | decimal | Area size of other natural areas within 800m buffer (CORINE)                    | Area size in m <sup>2</sup> of other natural areas within 800m buffer from CORINE data.                                | N/A        | 7        |
| physenv_cn_bf_lu800_water_0  | decimal | Area size of water within 800m buffer (CORINE)                                  | Area size in m <sup>2</sup> of water within 800m buffer from CORINE data.                                              | N/A        | 7        |
| physenv_cn_bf_lu800_ot_0     | decimal | Area size of other areas within 800m buffer (CORINE)                            | Area size in m <sup>2</sup> of other areas within 800m buffer from CORINE data.                                        | N/A        | 7        |
| physenv_ua_bf_lu1000_0       | decimal | Land use mix within 1000m buffer (Urban Atlas)                                  | Land use mix in m <sup>2</sup> within a 1000m buffer. It is calculated using an entropy formula from Urban Atlas data. | N/A        | 7        |
| physenv_ua_bf_lu1000_bu_0    | decimal | Area size of built-up area within 1000m buffer (Urban Atlas)                    | Area size in m <sup>2</sup> of built-up areas within 1000m buffer from Urban Atlas data.                               | N/A        | 7        |
| physenv_ua_bf_lu1000_ic_0    | decimal | Area size of industrial and commercial area within 1000m buffer (Urban Atlas)   | Area size in m <sup>2</sup> of industrial and commercial areas within 1000m buffer from Urban Atlas data.              | N/A        | 7        |
| physenv_ua_bf_lu1000_in_0    | decimal | Area size of infrastructure area within 1000m buffer (Urban Atlas)              | Area size in m <sup>2</sup> of infrastructure areas within 1000m buffer from Urban Atlas data.                         | N/A        | 7        |
| physenv_ua_bf_lu1000_po_0    | decimal | Area size of port area within 1000m buffer (Urban Atlas)                        | Area size in m <sup>2</sup> of ports (airports and sea ports) within 1000m buffer from Urban Atlas data.               | N/A        | 7        |
| physenv_ua_bf_lu1000_grurb_0 | decimal | Area size of green urban areas (land use) within 1000m buffer (Urban Atlas)     | Area size in m <sup>2</sup> of green urban areas (land use) within 1000m buffer from Urban Atlas data.                 | N/A        | 7        |
| physenv_ua_bf_lu1000_facil_0 | decimal | Area size of sports & leisure facilities area within 1000m buffer (Urban Atlas) | Area size in m <sup>2</sup> of sports & leisure facilities within 1000m buffer from Urban Atlas data.                  | N/A        | 7        |
| physenv_ua_bf_lu1000_agri_0  | decimal | Area size of agricultural land (land use) within 1000m buffer (Urban Atlas)     | Area size in m <sup>2</sup> of agricultural land (land use) within 1000m buffer from Urban Atlas data.                 | N/A        | 7        |

| Variable name                | Format  | Label                                                                            | Description                                                                                                            | Categories | # Events |
|------------------------------|---------|----------------------------------------------------------------------------------|------------------------------------------------------------------------------------------------------------------------|------------|----------|
| physenv_ua_bf_lu1000_on_0    | decimal | Area size of other natural areas within 1000m buffer (Urban Atlas)               | Area size in m <sup>2</sup> of other natural areas within 1000m buffer from Urban Atlas data.                          | N/A        | 7        |
| physenv_ua_bf_lu1000_water_0 | decimal | Area size of water within 1000m buffer (Urban Atlas)                             | Area size in m <sup>2</sup> of water within 1000m buffer from Urban Atlas data.                                        | N/A        | 7        |
| physenv_ua_bf_lu1000_ot_0    | decimal | Area size of other areas within 1000m buffer (Urban Atlas)                       | Area size in m <sup>2</sup> of other areas within 1000m buffer from Urban Atlas data.                                  | N/A        | 7        |
| physenv_cn_bf_lu1000_0       | decimal | Land use mix within 1000m buffer (CORINE)                                        | Land use mix in m <sup>2</sup> within a 1000m buffer. It is calculated using an entropy formula from CORINE data.      | N/A        | 7        |
| physenv_cn_bf_lu1000_bu_0    | decimal | Area size of built-up area within 1000m buffer (CORINE)                          | Area size in m <sup>2</sup> of built-up areas within 1000m buffer from CORINE data.                                    | N/A        | 7        |
| physenv_cn_bf_lu1000_ic_0    | decimal | Area size of industrial and commercial area within 1000m buffer (CORINE)         | Area size in m <sup>2</sup> of industrial and commercial areas within 1000m buffer from CORINE data.                   | N/A        | 7        |
| physenv_cn_bf_lu1000_in_0    | decimal | Area size of infrastructure area within 1000m buffer (CORINE)                    | Area size in m <sup>2</sup> of infrastructure areas within 1000m buffer from CORINE data.                              | N/A        | 7        |
| physenv_cn_bf_lu1000_po_0    | decimal | Area size of port area within 1000m buffer (CORINE)                              | Area size in m <sup>2</sup> of ports (airports and sea ports) within 1000m buffer from CORINE data.                    | N/A        | 7        |
| physenv_cn_bf_lu1000_grurb_0 | decimal | Area size of green urban areas (land use) within 1000m buffer (CORINE)           | Area size in m <sup>2</sup> of green urban areas (land use) within 1000m buffer from CORINE data.                      | N/A        | 7        |
| physenv_cn_bf_lu1000_facil_0 | decimal | Area size of sports & leisure facilities areas within 1000m buffer (CORINE)      | Area size in m <sup>2</sup> of sports & leisure facilities within 1000m buffer from CORINE data.                       | N/A        | 7        |
| physenv_cn_bf_lu1000_agri_0  | decimal | Area size of agricultural land (land use) within 1000m buffer (CORINE)           | Area size in m <sup>2</sup> of agricultural land (land use) within 1000m buffer from CORINE data.                      | N/A        | 7        |
| physenv_cn_bf_lu1000_on_0    | decimal | Area size of other natural areas within 1000m buffer (CORINE)                    | Area size in m <sup>2</sup> of other natural areas within 1000m buffer from CORINE data.                               | N/A        | 7        |
| physenv_cn_bf_lu1000_water_0 | decimal | Area size of water within 1000m buffer (CORINE)                                  | Area size in m <sup>2</sup> of water within 1000m buffering 1990 from CORINE data.                                     | N/A        | 7        |
| physenv_cn_bf_lu1000_ot_0    | decimal | Area size of other areas within 1000m buffer (CORINE)                            | Area size in m <sup>2</sup> of other areas within 1000m buffer from CORINE data.                                       | N/A        | 7        |
| physenv_ua_bf_lu1600_0       | decimal | Land use mix within 1600m buffer (Urban Atlas)                                   | Land use mix in m <sup>2</sup> within a 1600m buffer. It is calculated using an entropy formula from Urban Atlas data. | N/A        | 7        |
| physenv_ua_bf_lu1600_bu_0    | decimal | Area size of built-up areas within 1600m buffer (Urban Atlas)                    | Area size in m <sup>2</sup> of built-up areas within 1600m buffer from Urban Atlas data.                               | N/A        | 7        |
| physenv_ua_bf_lu1600_ic_0    | decimal | Area size of industrial and commercial areas within 1600m buffer (Urban Atlas)   | Area size in m <sup>2</sup> of industrial and commercial areas within 1600m buffer from Urban Atlas data.              | N/A        | 7        |
| physenv_ua_bf_lu1600_in_0    | decimal | Area size of infrastructure areas within 1600m buffer (Urban Atlas)              | Area size in m <sup>2</sup> of infrastructure areas within 1600m buffer from Urban Atlas data.                         | N/A        | 7        |
| physenv_ua_bf_lu1600_po_0    | decimal | Area size of port area within 1600m buffer (Urban Atlas)                         | Area size in m <sup>2</sup> of ports (airports and sea ports) within 1600m buffer from Urban Atlas data.               | N/A        | 7        |
| physenv_ua_bf_lu1600_grurb_0 | decimal | Area size of green urban areas (land use) within 1600m buffer (Urban Atlas)      | Area size in m <sup>2</sup> of green urban areas (land use) within 1600m buffer from Urban Atlas data.                 | N/A        | 7        |
| physenv_ua_bf_lu1600_facil_0 | decimal | Area size of sports & leisure facilities areas within 1600m buffer (Urban Atlas) | Area size in m <sup>2</sup> of sports & leisure facilities within 1600m buffer from Urban Atlas data.                  | N/A        | 7        |
| physenv_ua_bf_lu1600_agri_0  | decimal | Area size of agricultural land (land use) within 1600m buffer (Urban Atlas)      | Area size in m <sup>2</sup> of agricultural land (land use) within 1600m buffer from Urban Atlas data.                 | N/A        | 7        |
| physenv_ua_bf_lu1600_on_0    | decimal | Area size of other natural areas within 1600m buffer (Urban Atlas)               | Area size in m <sup>2</sup> of other natural areas within 1600m buffer from Urban Atlas data.                          | N/A        | 7        |
| physenv_ua_bf_lu1600_water_0 | decimal | Area size of water within 1600m buffer (Urban Atlas)                             | Area size in m <sup>2</sup> of water within 1600m buffer from Urban Atlas data.                                        | N/A        | 7        |
| physenv_ua_bf_lu1600_ot_0    | decimal | Area size of other areas within 1600m buffer (Urban Atlas)                       | Area size in m <sup>2</sup> of other areas within 1600m buffer from Urban Atlas data.                                  | N/A        | 7        |

| Variable name                | Format  | Label                                                                       | Description                                                                                                                                                                                                | Categories                                                                                                                                                                                                                                                                                             | # Events |
|------------------------------|---------|-----------------------------------------------------------------------------|------------------------------------------------------------------------------------------------------------------------------------------------------------------------------------------------------------|--------------------------------------------------------------------------------------------------------------------------------------------------------------------------------------------------------------------------------------------------------------------------------------------------------|----------|
| physenv_cn_bf_lu1600_0       | decimal | Land use mix within 1600m buffer (CORINE)                                   | Land use mix in m <sup>2</sup> within a 1600m buffer. It is calculated using an entropy formula from CORINE data.                                                                                          | N/A                                                                                                                                                                                                                                                                                                    | 7        |
| physenv_cn_bf_lu1600_bu_0    | decimal | Area size of built-up areas within 1600m buffer (CORINE)                    | Area size in m <sup>2</sup> of built-up areas within 1600m buffer from CORINE data.                                                                                                                        | N/A                                                                                                                                                                                                                                                                                                    | 7        |
| physenv_cn_bf_lu1600_ic_0    | decimal | Area size of industrial and commercial areas within 1600m buffer (CORINE)   | Area size in m <sup>2</sup> of industrial and commercial areas within 1600m buffer from CORINE data.                                                                                                       | N/A                                                                                                                                                                                                                                                                                                    | 7        |
| physenv_cn_bf_lu1600_in_0    | decimal | Area size of infrastructure areas within 1600m buffer (CORINE)              | Area size in m <sup>2</sup> of infrastructure areas within 1600m buffer from CORINE data.                                                                                                                  | N/A                                                                                                                                                                                                                                                                                                    | 7        |
| physenv_cn_bf_lu1600_po_0    | decimal | Area size of port area within 1600m buffer (CORINE)                         | Area size in m <sup>2</sup> of ports (airports and sea ports) within 1600m buffer from CORINE data.                                                                                                        | N/A                                                                                                                                                                                                                                                                                                    | 7        |
| physenv_cn_bf_lu1600_grurb_0 | decimal | Area size of green urban areas (land use) within 1600m buffer (CORINE)      | Area size in m <sup>2</sup> of green urban areas (land use) within 1600m buffer from CORINE data.                                                                                                          | N/A                                                                                                                                                                                                                                                                                                    | 7        |
| physenv_cn_bf_lu1600_facil_0 | decimal | Area size of sports & leisure facilities areas within 1600m buffer (CORINE) | Area size in m <sup>2</sup> of sports & leisure facilities within 1600m buffer from CORINE data.                                                                                                           | N/A                                                                                                                                                                                                                                                                                                    | 7        |
| physenv_cn_bf_lu1600_agri_0  | decimal | Area size of agricultural land (land use) within 1600m buffer (CORINE)      | Area size in m <sup>2</sup> of agricultural land (land use) within 1600m buffer from CORINE data.                                                                                                          | N/A                                                                                                                                                                                                                                                                                                    | 7        |
| physenv_cn_bf_lu1600_on_0    | decimal | Area size of other natural areas within 1600m buffer (CORINE)               | Area size in m <sup>2</sup> of other natural areas within 1600m buffer from CORINE data.                                                                                                                   | N/A                                                                                                                                                                                                                                                                                                    | 7        |
| physenv_cn_bf_lu1600_water_0 | decimal | Area size of water within 1600m buffer (CORINE)                             | Area size in m <sup>2</sup> of water within 1600m buffer from CORINE data.                                                                                                                                 | N/A                                                                                                                                                                                                                                                                                                    | 7        |
| physenv_cn_bf_lu1600_ot_0    | decimal | Area size of other areas within 1600m buffer (CORINE)                       | Area size in m <sup>2</sup> of other areas within 1600m buffer from CORINE data.                                                                                                                           | N/A                                                                                                                                                                                                                                                                                                    | 7        |
| physenv_ua_urbcy_0           | integer | Urbanicity grade (Urban Atlas)                                              | Urbanicity grade based on the classes from the urban atlas. This is a categorical variable with 5 classes ranging from continuous urban to dense, medium, low, and very low density from Urban Atlas data. | 1 = Continuous urban fabric (S.L. > 80%)<br>2 = Discontinuous dense urban fabric (S.L.: 50% - 80%)<br>3 = Discontinuous medium density urban fabric (S.L.: 30% - 50%)<br>4 = Discontinuous low density urban fabric (S.L.: 10% - 30%)<br>5 = Discontinuous very low density urban fabric (S.L.: < 10%) | 7        |
| physenv_cn_urbcy_0           | integer | Urbanicity grade (CORINE)                                                   | Urbanicity grade based on the classes from the CORINE. This is a categorical variable with 2 classes being from continuous urban to dense, medium, low, and very low density from CORINE data.             | 0 = Continuous urban fabric (S.L. > 80%)<br>1 = Discontinuous urban fabric (S.L.: 30% - 80%)                                                                                                                                                                                                           | 7        |

#### Administrative information

|              |      |                                           |                                           |     |   |
|--------------|------|-------------------------------------------|-------------------------------------------|-----|---|
| baseline_yr  | text | Baseline Year                             | Baseline Year                             | N/A | 1 |
| followup1_yr | text | Follow-up 1 year                          | Follow-up 1 year                          | N/A | 1 |
| followup2_yr | text | Follow-up 2 year                          | Follow-up 2 year                          | N/A | 1 |
| followup3_yr | text | Follow-up 3 year                          | Follow-up 3 year                          | N/A | 1 |
| followup4_yr | text | Follow-up 4 year                          | Follow-up 4 year                          | N/A | 1 |
| followup5_yr | text | Follow-up 5 year                          | Follow-up 5 year                          | N/A | 1 |
| followup6_yr | text | Follow-up 6 year                          | Follow-up 6 year                          | N/A | 1 |
| t1           | text | Years between follow-up 1 and baseline    | Years between follow-up 1 and baseline    | N/A | 1 |
| t2           | text | Years between follow-up 2 and follow-up 1 | Years between follow-up 2 and follow-up 1 | N/A | 1 |
| t3           | text | Years between follow-up 3 and follow-up 2 | Years between follow-up 3 and follow-up 2 | N/A | 1 |

| Variable name | Format | Label                                     | Description                               | Categories | # Events |
|---------------|--------|-------------------------------------------|-------------------------------------------|------------|----------|
| t4            | text   | Years between follow-up 4 and follow-up 3 | Years between follow-up 4 and follow-up 3 | N/A        | 1        |
| t5            | text   | Years between follow-up 5 and follow-up 4 | Years between follow-up 5 and follow-up 4 | N/A        | 1        |
| t6            | text   | Years between follow-up 6 and follow-up 5 | Years between follow-up 6 and follow-up 5 | N/A        | 1        |
